# Supplementary material for: The regulatory T cell-selective interleukin-2 receptor agonist rezpegaldesleukin in the treatment of inflammatory skin diseases: two randomized, double-blind, placebo-controlled phase 1b trials
Source: PubMed Central journal article supplement — Nat Commun. 2024 Oct 25;15:9230. doi: 10.1038/s41467-024-53384-1 (PMC11511931; doi:10.1038/s41467-024-53384-1), 2024-10-25
Supplement: 41467_2024_53384_MOESM1_ESM.pdf [file 41467_2024_53384_MOESM1_ESM.pdf]

# SUPPLEMENTARY INFORMATION

## Title

The regulatory T cell-selective interleukin-2 receptor agonist rezpegaldesleukin in the treatment of inflammatory skin diseases: two randomized, double-blind, placebo-controlled phase 1b trials

## Authors

Jonathan I. Silverberg<sup>1</sup>, David Rosmarin<sup>2</sup>, Raj Chovatiya<sup>3,4</sup>, Thomas Bieber<sup>5,6</sup>, Stephen Schleicher<sup>7</sup>, Lisa Beck<sup>8</sup>, Melinda Gooderham<sup>9</sup>, Sohail Chaudhry<sup>10</sup>, Christie Fanton<sup>10</sup>, Danni Yu<sup>10</sup>, Joshua Levy<sup>11</sup>, Yi Liu<sup>10</sup>, Takahiro Miyazaki<sup>10</sup>, Mary Tagliaferri<sup>10</sup>, Carsten Schmitz<sup>12</sup>, Ajay Nirula<sup>13</sup>, Brian Kotzin<sup>10</sup>, Jonathan Zalevsky<sup>10</sup>

## Affiliations

<sup>1</sup>Department of Dermatology, George Washington University School of Medicine, Washington, DC, USA; <sup>2</sup>Indiana University School of Medicine, Indianapolis, IN, USA; <sup>3</sup>Chicago Medical School, Rosalind Franklin University of Medicine and Science, North Chicago, IL, USA; <sup>4</sup>Center for Medical Dermatology + Immunology Research, Chicago, IL, USA; <sup>5</sup>Department of Dermatology, University Hospital, Zürich, Switzerland; <sup>6</sup>Medicine Campus Davos, Switzerland; <sup>7</sup>DermDox Centers for Dermatology, Sugarloaf, PA, USA; <sup>8</sup>University of Rochester Medical Center, Rochester, NY, USA; <sup>9</sup>Department of Medicine, Queen's University, Kingston, ON, Canada; <sup>10</sup>Nektar Therapeutics, San Francisco, CA, USA; <sup>11</sup>Levy Informatics LLC, Chapel Hill, NC, USA; <sup>12</sup>Eli Lilly and Company, Indianapolis, IN, USA; <sup>13</sup>Recludix Pharma, San Diego, CA, USA, formerly affiliated with Eli Lilly and Company, Indianapolis, IN, USA

Corresponding author, JZalevsky@nektar.com

## Table of Contents

|                                                                                                                                     |           |
|-------------------------------------------------------------------------------------------------------------------------------------|-----------|
| <b>SUPPLEMENTARY FIGURE 1   REZPEG REDUCES INFLAMMATION IN DTH.....</b>                                                             | <b>4</b>  |
| <b>SUPPLEMENTARY FIGURE 2   PSO STUDY DESIGN AND PATIENT COMPLETION SUMMARY .....</b>                                               | <b>5</b>  |
| <b>SUPPLEMENTARY FIGURE 3   AD STUDY DESIGN AND PATIENT COMPLETION SUMMARY .....</b>                                                | <b>6</b>  |
| <b>SUPPLEMENTARY FIGURE 4   REZPEG-INDUCED CD25<sup>BRIGHT</sup> TREG PHARMACODYNAMICS IN PSO AND AD PATIENTS .....</b>             | <b>7</b>  |
| <b>SUPPLEMENTARY FIGURE 5   REZPEG-INDUCED TOTAL TREG AND CONVENTIONAL T CELL PHARMACODYNAMICS IN PSO AND AD PATIENTS.....</b>      | <b>8</b>  |
| <b>SUPPLEMENTARY FIGURE 6   REZPEG NK CELL PHARMACODYNAMICS IN PSO AND AD PATIENTS .....</b>                                        | <b>9</b>  |
| <b>SUPPLEMENTARY FIGURE 7   SERUM PROTEOMIC PATHWAY ANALYSIS.....</b>                                                               | <b>10</b> |
| <b>SUPPLEMENTARY FIGURE 8   REZPEG MECHANISM OF ACTION HYPOTHESIS IN RESTORING TREG HOMEOSTASIS IN INFLAMMATORY DISORDERS .....</b> | <b>11</b> |
| <b>SUPPLEMENTARY FIGURE 9   EXAMPLE GATING STRATEGY FOR CD25<sup>BRIGHT</sup> TREG FLOW CYTOMETRY IMMUNOPHENOTYPING .....</b>       | <b>12</b> |
| <b>SUPPLEMENTARY TABLE 1   REZPEG EXPOSURE IN AD AND PSO PATIENTS: ESTIMATED C<sub>MAX</sub> AND AUC<sub>LAST</sub> .....</b>       | <b>13</b> |
| <b>SUPPLEMENTARY TABLE 2   REZPEG EFFICACY IN PSO PATIENTS AT WEEK 12 .....</b>                                                     | <b>14</b> |
| <b>SUPPLEMENTARY TABLE 3   EFFICACY DURABILITY IN AD REZPEG 24 MG/KG COHORT .....</b>                                               | <b>15</b> |
| <b>SUPPLEMENTARY TABLE 4   TABLE OF STATISTICALLY SIGNIFICANT AND LIST OF NON-SIGNIFICANT SERUM PROTEOMIC BIOMARKERS .....</b>      | <b>16</b> |
| <b>SUPPLEMENTARY TABLE 5   TABLE OF STATISTICALLY SIGNIFICANT REZPEG-MODULATED PROTEINS GROUPED BY PATHWAY .....</b>                | <b>19</b> |
| <b>SUPPLEMENTARY TABLE 6   SAMPLE NUMBERS FOR PSORIASIS PHARMACOKINETIC AND PHARMACODYNAMIC ANALYSES .....</b>                      | <b>20</b> |
| <b>SUPPLEMENTARY TABLE 7   SAMPLE NUMBERS FOR ATOPIC DERMATITIS PHARMACOKINETIC AND PHARMACODYNAMIC ANALYSES.....</b>               | <b>21</b> |

|                                                                                                                             |                  |
|-----------------------------------------------------------------------------------------------------------------------------|------------------|
| <b><u>SUPPLEMENTARY TABLE 8   PSORIASIS PATIENT NUMBERS FOR CONTINUOUS ENDPOINTS.....</u></b>                               | <b><u>22</u></b> |
| <b><u>SUPPLEMENTARY TABLE 9   ATOPIC DERMATITIS PATIENT NUMBERS FOR CONTINUOUS ENDPOINTS</u></b>                            | <b><u>23</u></b> |
| <b><u>SUPPLEMENTARY TABLE 10   SAMPLE NUMBERS FOR SERUM PROTEOMIC BIOMARKER ANALYSES ...</u></b>                            | <b><u>24</u></b> |
| <b><u>SUPPLEMENTARY TABLE 11   RESCUE MEDICATIONS FOR THE INDICATION OF ATOPIC DERMATITIS ..</u></b>                        | <b><u>25</u></b> |
| <b><u>SUPPLEMENTARY TABLE 12   SOURCE ANTIBODIES USED FOR PHARMACOKINETIC AND<br/>PHARMACODYNAMIC ASSESSMENTS .....</u></b> | <b><u>26</u></b> |
| <b><u>SUPPLEMENTARY REFERENCES .....</u></b>                                                                                | <b><u>27</u></b> |

## Supplementary Figure 1 | REZPEG reduces inflammation in DTH

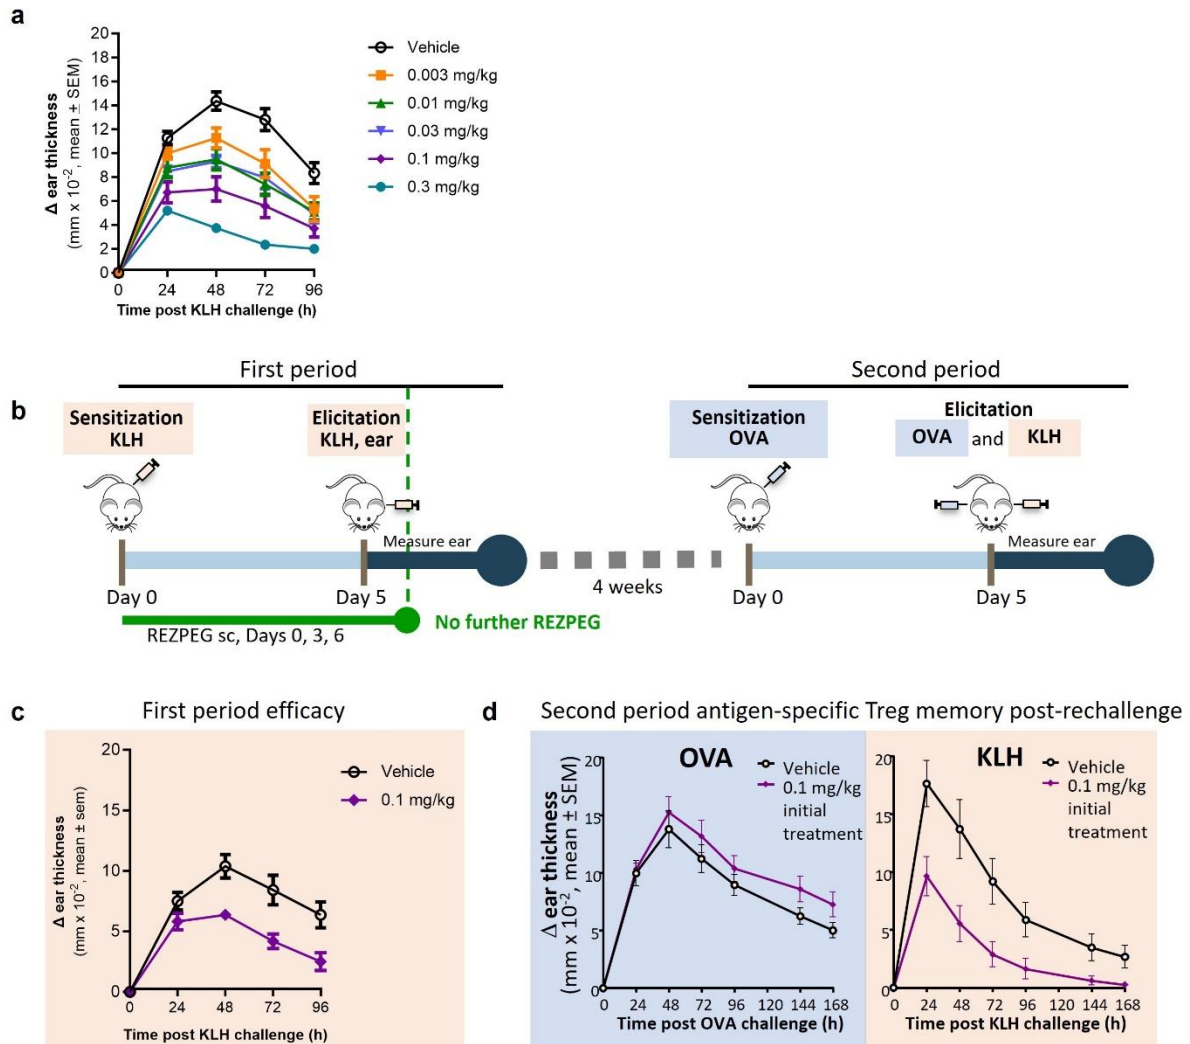

**Supplementary Figure 1 | REZPEG reduces inflammation in DTH.** Female BALB/c mice aged 6–8 weeks were used in the DTH model. **a**, REZPEG-induced dose-dependent reductions in ear thickness ( $n=10$  per group). **b**, Study design for the antigen-specific mouse model of DTH. **c**, REZPEG-dependent reduction in ear thickness after KLH sensitization and challenge in the first period ( $n=8$  per group). **d**, Reduction in antigen-specific ear thickness after OVA sensitization and challenge or KLH re-challenge in the second period ( $n=8$  per group). Data shown as mean  $\pm$  SEM. DTH, delayed-type hypersensitivity; KLH, keyhole limpet haemocyanin; OVA, ovalbumin; area and severity index; SEM, standard error of the mean; Tregs, regulatory T cells. Source data are provided as a Source Data file.

## Supplementary Figure 2 | PsO study design and patient completion summary

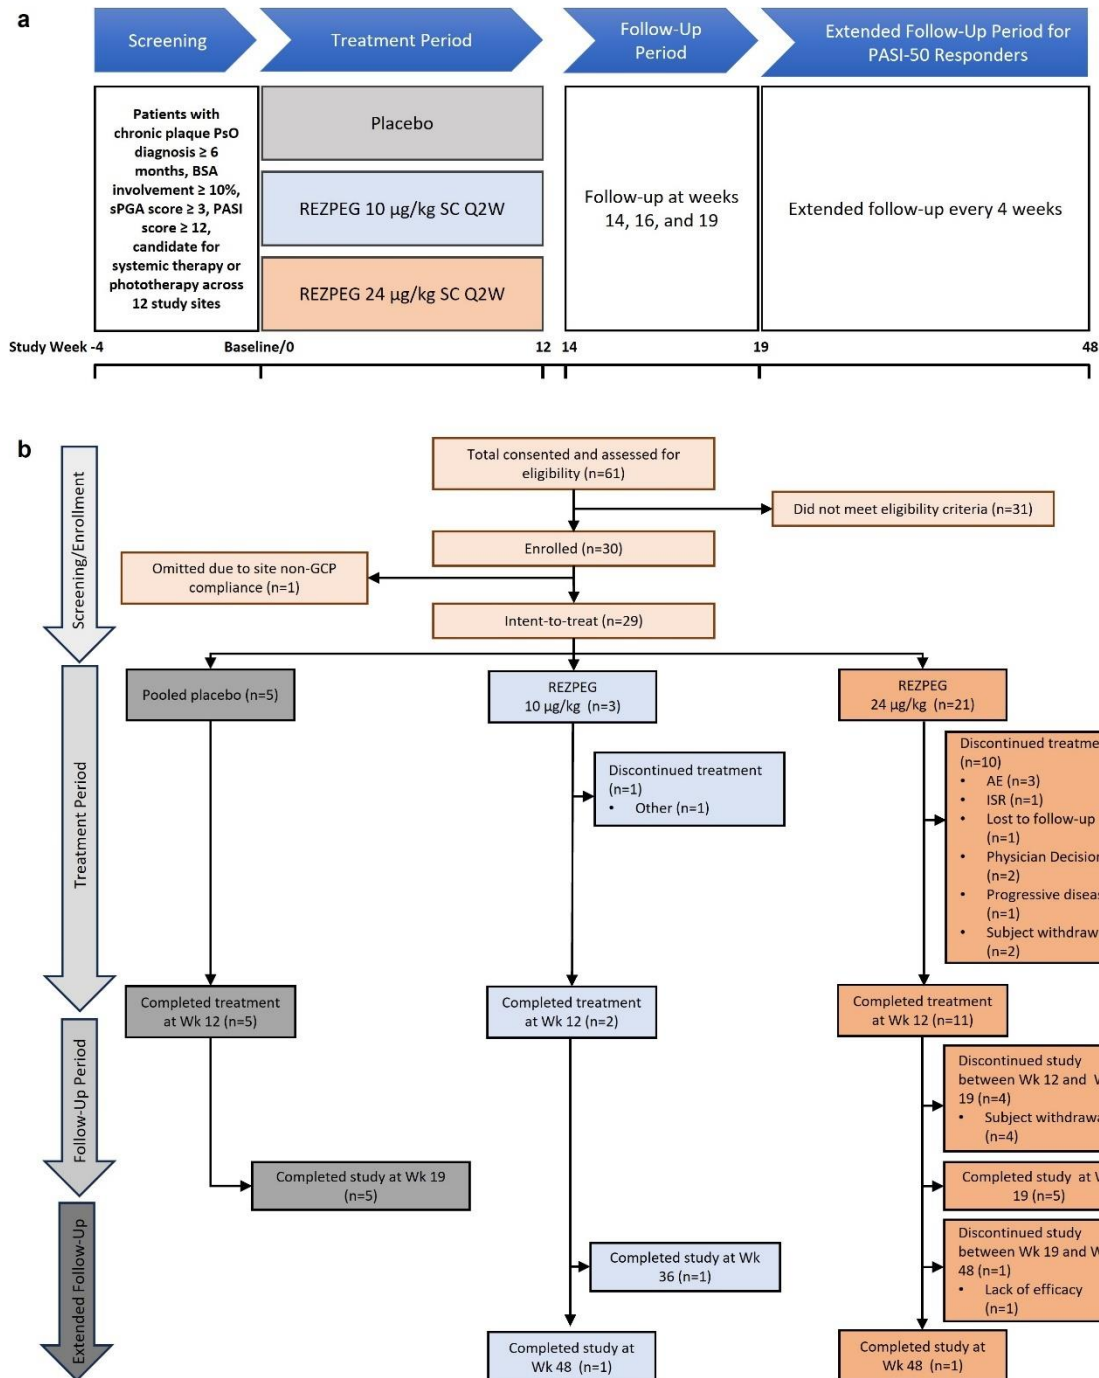

**Supplementary Figure 2 | PsO study design and patient completion summary.** **a**, PsO study visits took place at baseline and on days 1, 3, 5, 8, 11, 15, 22, and 29 during the first 4 weeks, then every 2 weeks until the end of the treatment period at week 12, then at weeks 14, 16, and 19 during the off-treatment follow-up period. Week 19 PASI-50 responders were followed during study visits every 4 weeks in an extended follow-up period from weeks 24 to 48. **b**, PsO patient disposition. BSA, body surface area; PASI, psoriasis area and severity index; Q2W, every 2 weeks; PsO, psoriasis; SC, subcutaneously; sPGA, static physician global assessment.

## Supplementary Figure 3 | AD study design and patient completion summary

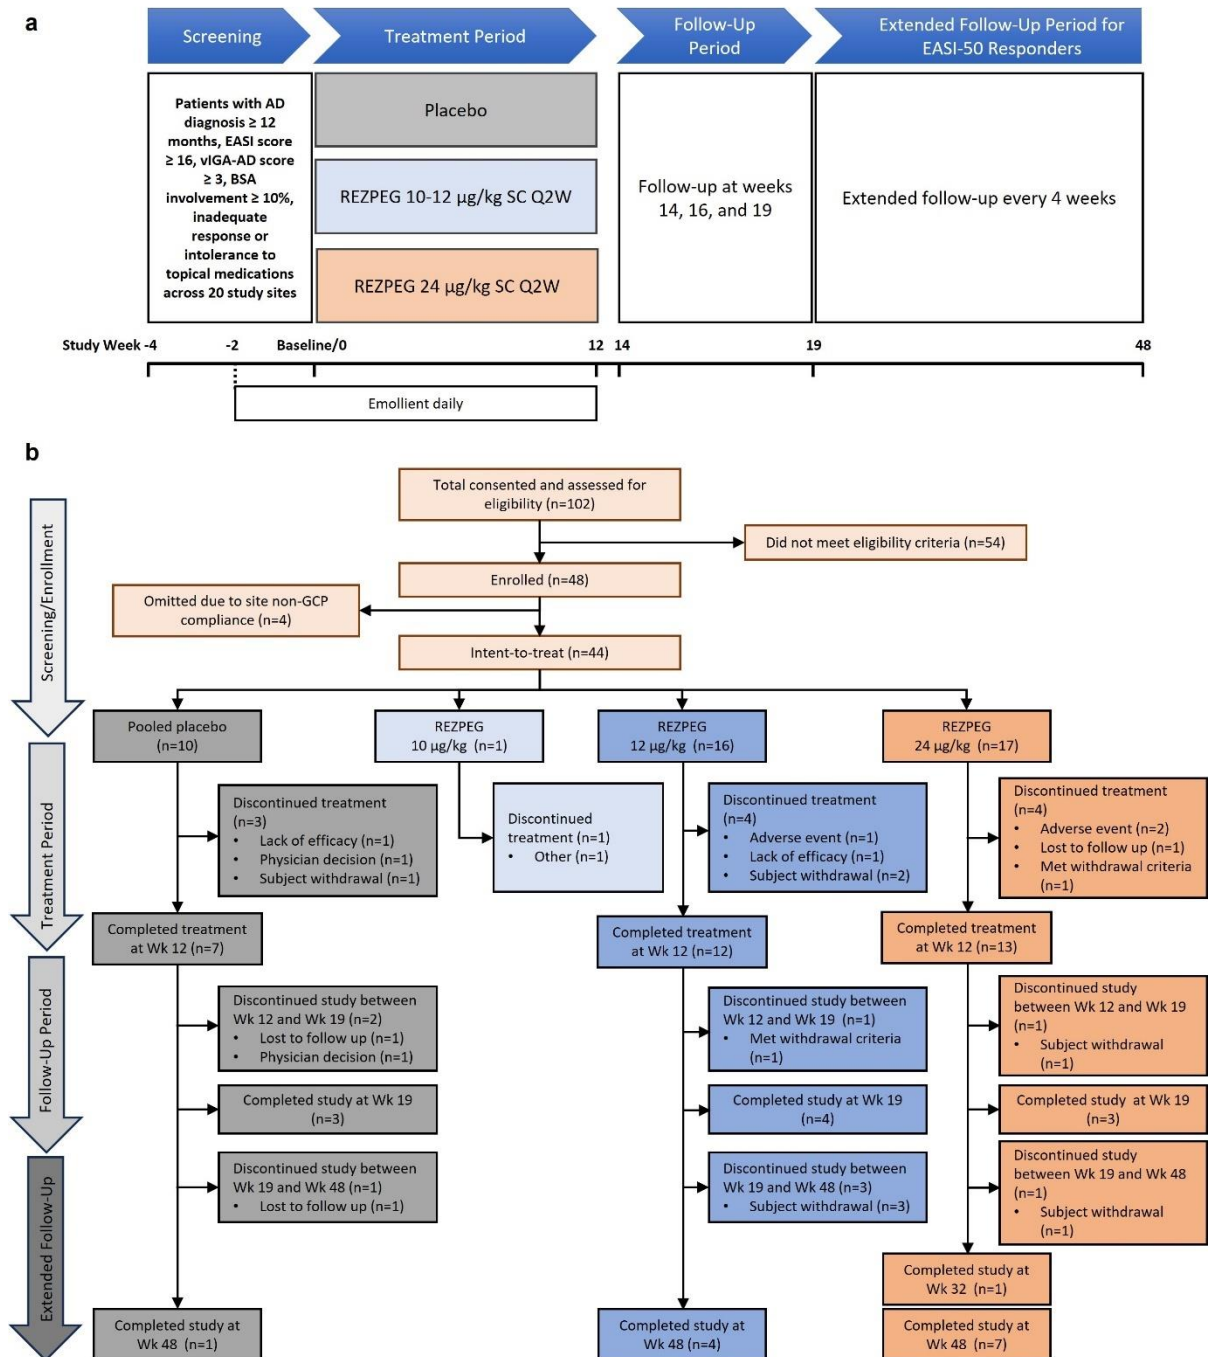

**Supplementary Figure 3 | AD study design and patient completion summary.** **a**, AD study visits took place at baseline and on days 1, 3, 5, 8, 11, 15, 22 and 29 during the first 4 weeks, then every two weeks until the end of the treatment period at week 12, then at weeks 14, 16 and 19 during the off-treatment follow-up period. Week 19 EASI-50 responders were followed during study visits every 4 weeks in an extended follow-up period from weeks 24 to 48. **b**, AD patient disposition. AD, atopic dermatitis; BSA, body surface area; EASI, eczema area and severity index; Q2W, every 2 weeks; SC, subcutaneously; vIGA-AD, validated Investigator Global Assessment scale for Atopic Dermatitis.

## Supplementary Figure 4 | REZPEG-induced CD25<sup>bright</sup> Treg pharmacodynamics in PsO and AD patients

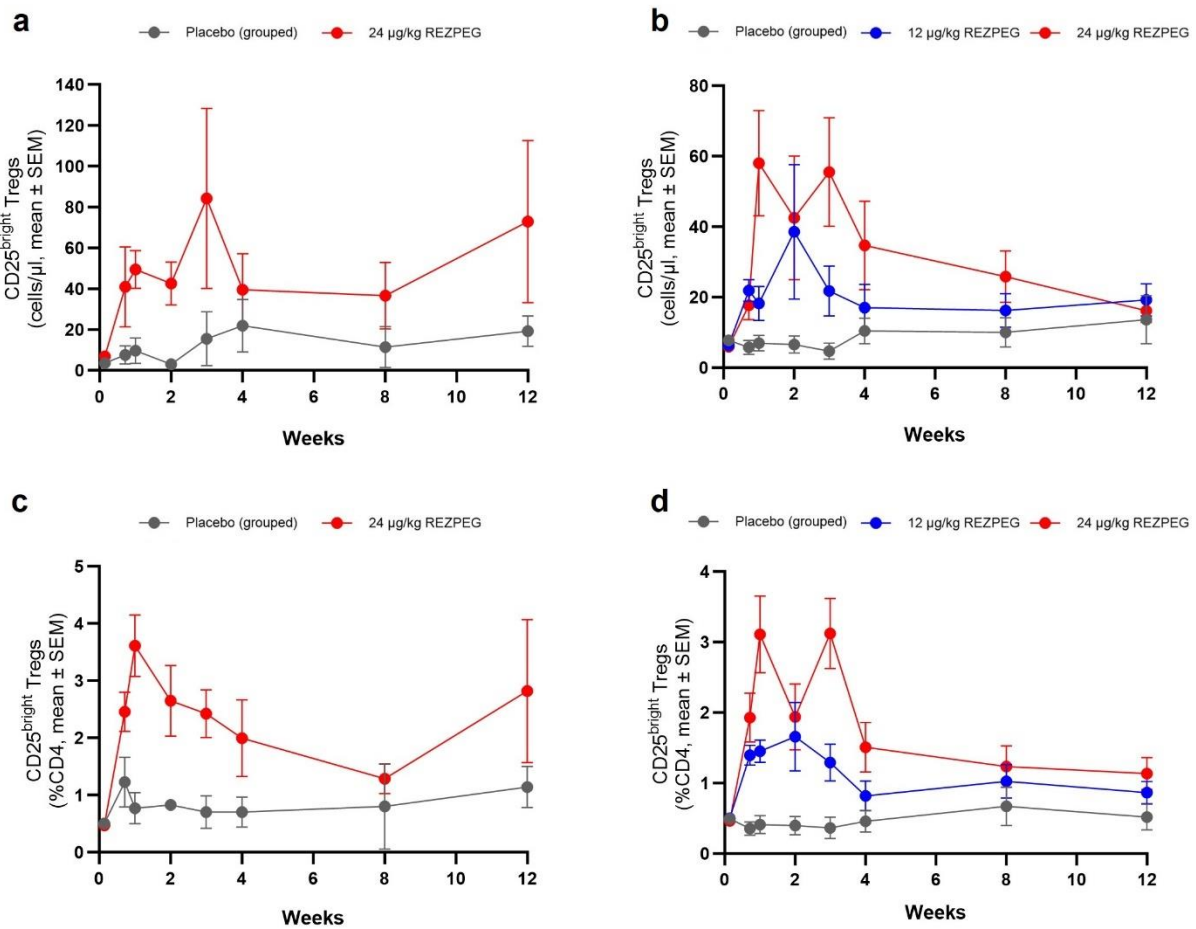

**Supplementary Figure 4 | REZPEG-induced CD25<sup>bright</sup> Treg pharmacodynamics in PsO and AD patients.** Total CD25<sup>bright</sup> Tregs (cells/μL) in **a**, PsO patients and **b**, AD patients. CD25<sup>bright</sup> Tregs as a percentage of CD4<sup>+</sup> T cells in **c**, PsO patients and **d**, AD patients. All measurements performed using peripheral blood samples from patients treated with placebo (grey circles), REZPEG 12 μg/kg (blue circles), or REZPEG 24 μg/kg (red circles) administered once every 2 weeks for 12 weeks. Data shown as mean ± SEM. Number of samples at each time point provided in Supplementary Tables 6 (PsO) and 7 (AD). AD, atopic dermatitis; PsO, psoriasis; SEM, standard error of the mean; Treg, regulatory T cell. Source data are provided as a Source Data file.

## Supplementary Figure 5 | REZPEG-induced total Treg and conventional T cell pharmacodynamics in PsO and AD patients

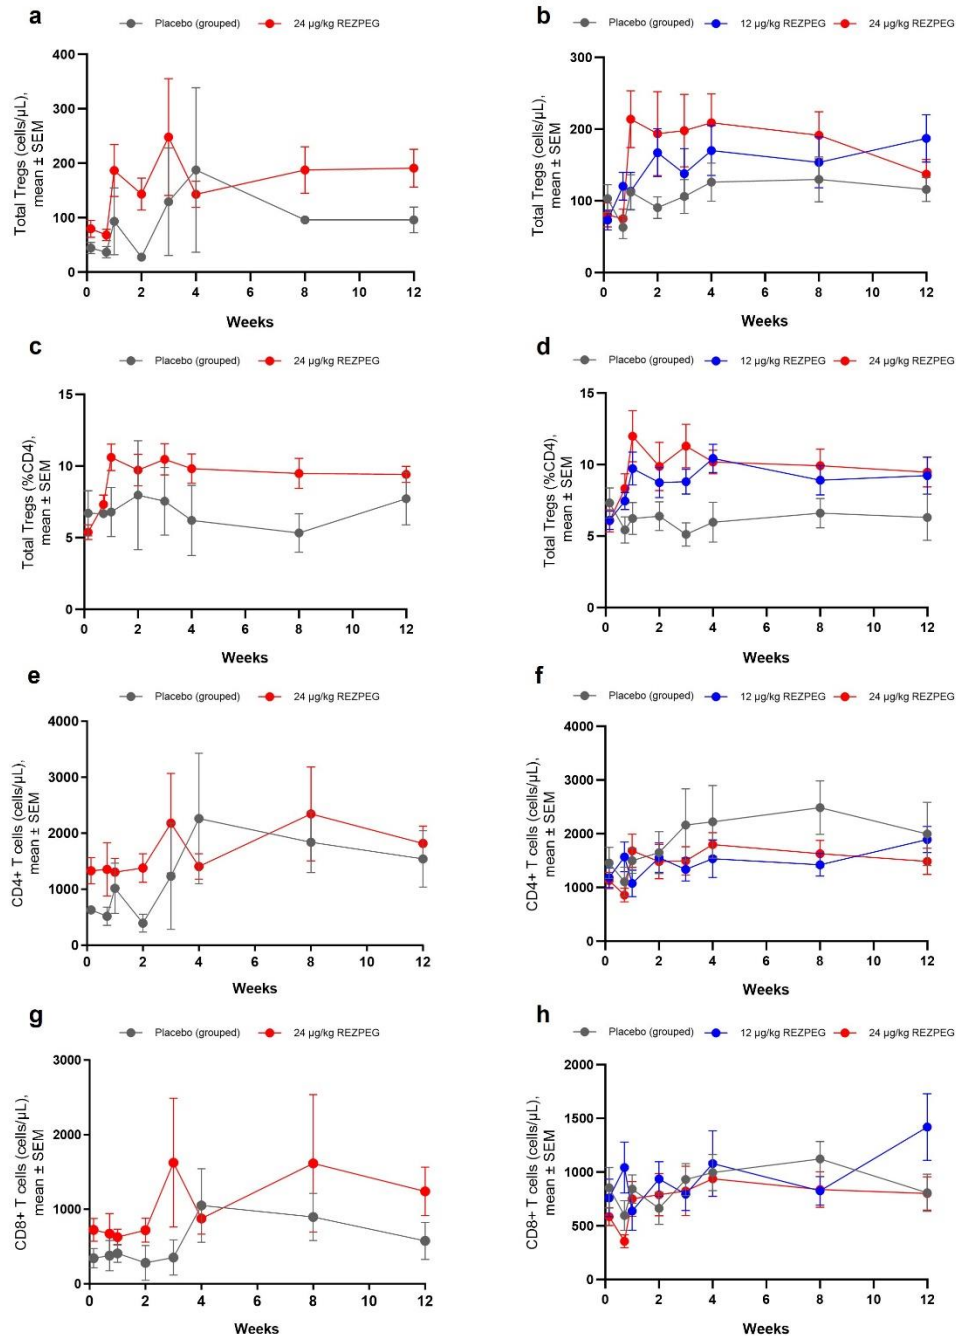

**Supplementary Figure 5 | REZPEG-induced Treg and conventional T cell pharmacodynamics in PsO and AD patients.** Total Tregs (cells/ $\mu$ L) in **a**, PsO patients and **b**, AD patients. Total Tregs as a percentage of CD4+ T cells in **c**, PsO patients and **d**, AD patients. CD4+ T cells in **e**, PsO and **f**, AD patients. CD8+ T cells in **g**, PsO and **h**, AD patients. All measurements performed using peripheral blood samples from patients treated with placebo (grey circles), REZPEG 12  $\mu$ g/kg (blue circles), or REZPEG 24  $\mu$ g/kg (red circles) administered once every 2 weeks for 12 weeks. Data shown as mean  $\pm$  SEM. Number of samples at each time point provided in Supplementary Tables 6 (PsO) and 7 (AD). AD, atopic dermatitis; PsO, psoriasis; SEM, standard error of the mean; Treg, regulatory T cell. Source data are provided as a Source Data file.

## Supplementary Figure 6 | REZPEG NK cell pharmacodynamics in PsO and AD patients

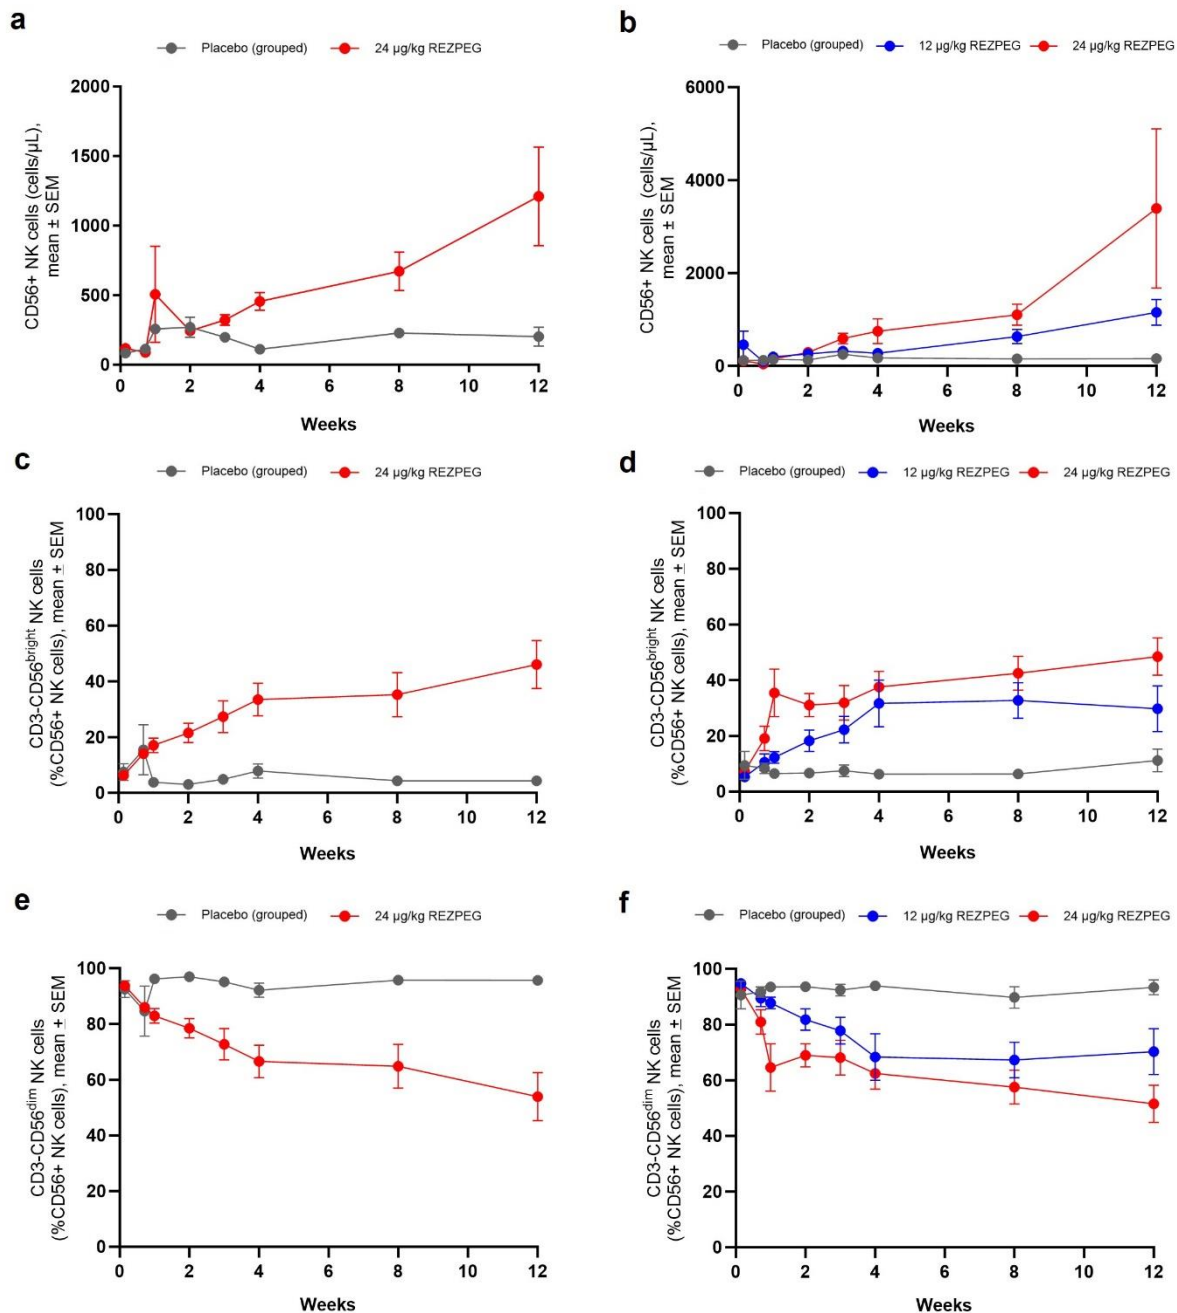

**Supplementary Figure 6 | REZPEG NK cell pharmacodynamics in PsO and AD patients.** Absolute counts (cells/ $\mu$ L) of total NK cells in **a**, PsO patients and **b**, AD patients. CD56<sup>bright</sup> NK cells as a percentage of CD56+ NK cells in **c**, PsO patients and **d**, AD patients. CD56<sup>dim</sup> NK cells as a percentage of CD56+ NK cells in **e**, PsO patients and **f**, AD patients. All measurements performed using peripheral blood samples from patients treated with placebo (grey circles), REZPEG 12  $\mu$ g/kg (blue circles) or 24  $\mu$ g/kg (red circles) administered once every 2 weeks for 12 weeks. Number of samples at each time point provided in Supplementary Tables 6 (PsO) and 7 (AD). Data shown as mean  $\pm$  SEM. AD, atopic dermatitis; NK, natural killer; PsO, psoriasis; SEM, standard error of the mean. Source data are provided as a Source Data file.

## Supplementary Figure 7 | Serum proteomic pathway analysis

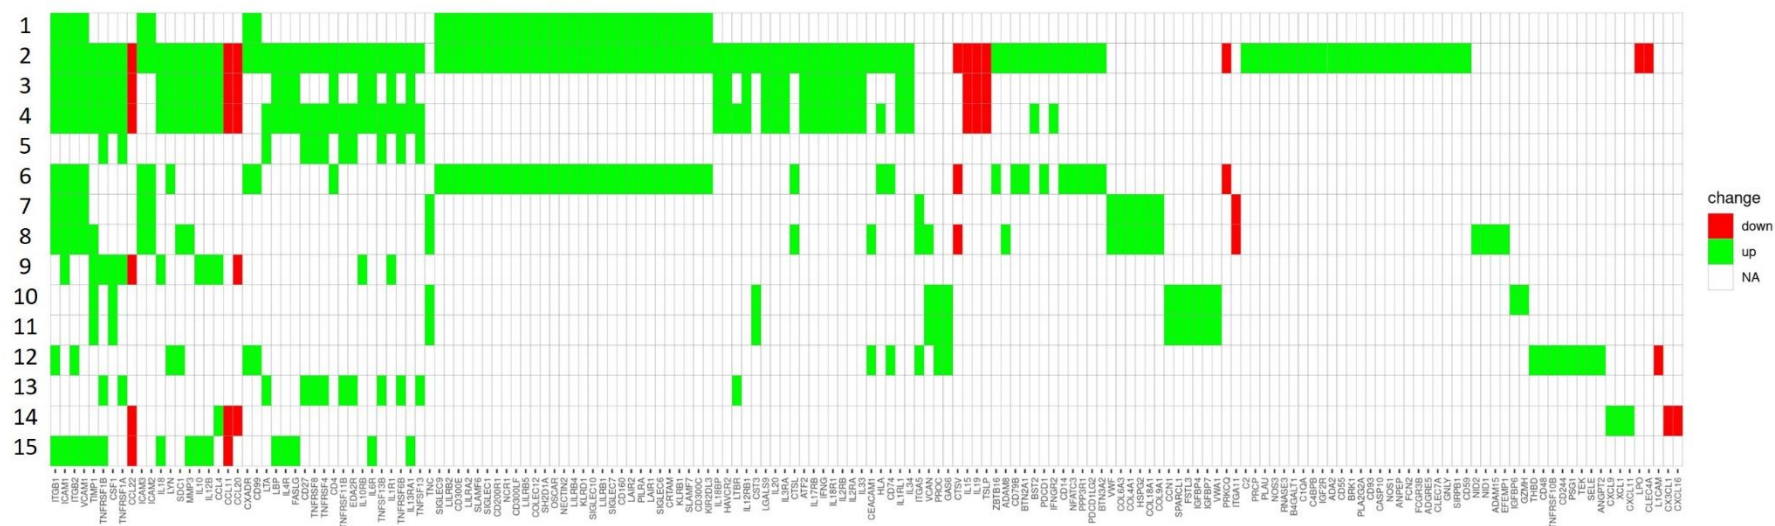

## Supplementary Figure 8 | REZPEG mechanism of action hypothesis in restoring Treg homeostasis in inflammatory disorders

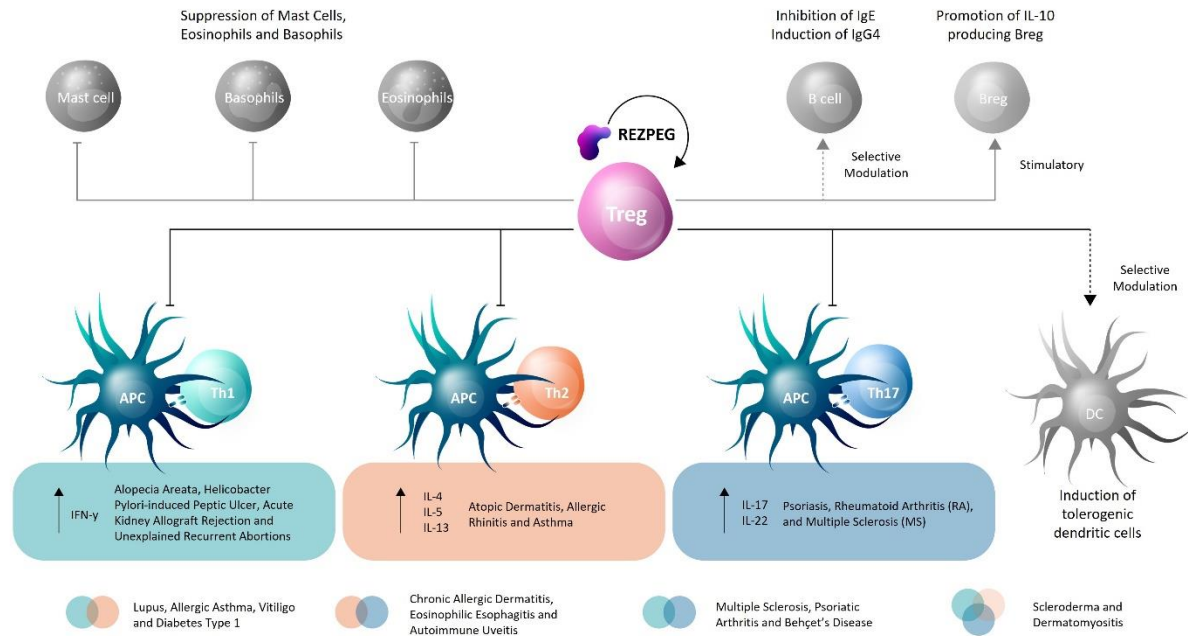

**Supplementary Figure 8 | REZPEG mechanism of action hypothesis in restoring Treg homeostasis in inflammatory disorders.** The novel IL-2R pathway agonist REZPEG promotes the proliferation and activation of Tregs that are impaired in diverse pathologies that often involve overlapping immunological pathways. As key immunoregulators, Tregs have a broad range of biological activity, including suppression of APC-driven inflammatory cytokine secretion from Th1, Th2, and Th17 helper T cells. Tregs can also suppress inflammatory mast cells, eosinophils, and basophils. Restoration of immune balance is also achieved by Treg promotion of anti-inflammatory IL-10 production from Bregs, selective modulation of B cells by inhibition of IgE or induction of IgG4, or via induction of tolerogenic dendritic cells. APC, antigen presenting cell; Breg, regulatory B cell; DC, dendritic cell; IFN- $\gamma$ , interferon gamma; IgG4, immunoglobulin G4; IgE, immunoglobulin E; IL-2R, interleukin-2 receptor; Treg, regulatory T cell.

## Supplementary Figure 9 | Example gating strategy for CD25<sup>bright</sup> Treg flow cytometry immunophenotyping

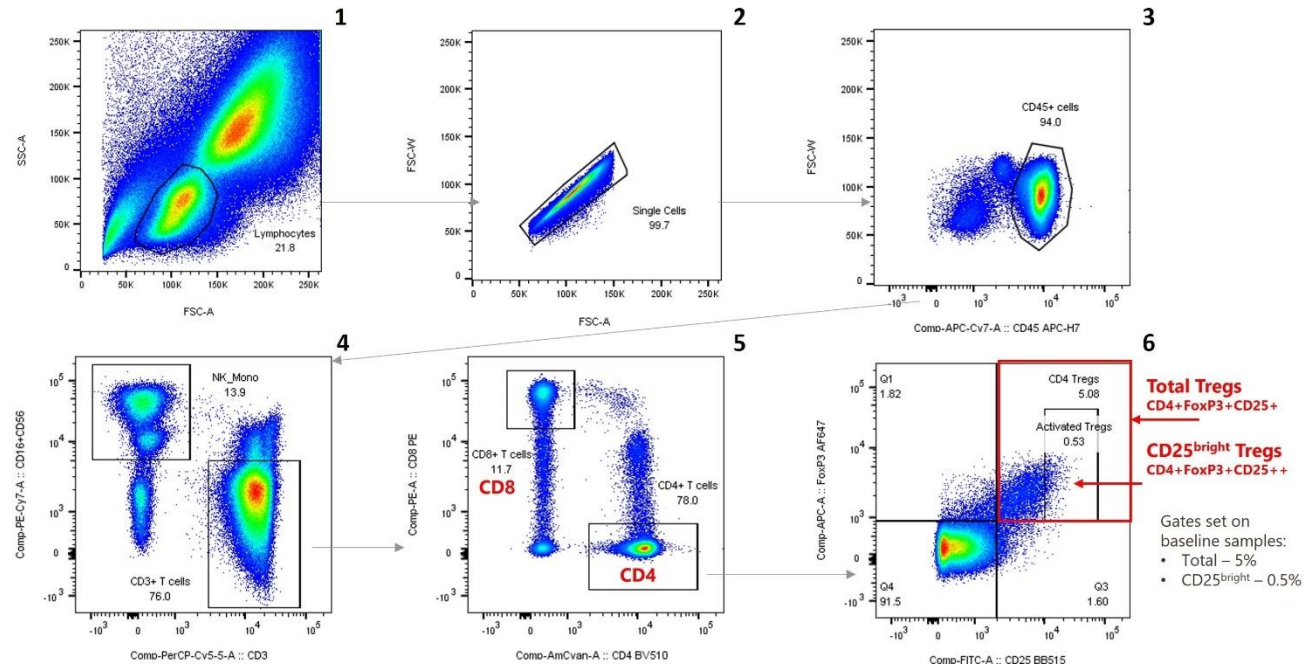

**Supplementary Figure 9 | Example gating strategy for CD25<sup>bright</sup> Treg flow cytometric immunophenotyping.** Gating was performed as reported in Fanton et al, 2022. Briefly, after gating on lymphocytes (box 1), positive populations were identified based on fluorescence minus one control. Total Tregs were defined as CD45+CD3+CD4+CD25+FoxP3+ (box 6); CD25<sup>bright</sup> Tregs were defined as CD45+CD3+CD4+CD25++FoxP3+ (box 6); CD4+ T cells as CD45+CD3+CD4+ (box 5); CD8+ T cells as CD45+CD3+CD8+ (box 5); and total NK cells as CD45+CD3-CD56+ (box 4). NK cells were further phenotyped from the CD3-CD56+ population in box 4 as CD56<sup>bright</sup> and CD56<sup>dim</sup>. To ensure comparability across longitudinal samples, the baseline total Treg gate was set to approximately 5% (4-6%) of CD4+ T cells for each individual, and this gate position was maintained across the individual's timepoints. For CD25<sup>bright</sup> Tregs, the baseline gate was set at approximately 0.5% (0.4-0.6%) of CD4+ T cells for each individual. FOXP3, forkhead box protein P3; FSC-W, forward light scatter width; NK, natural killer; SSC-A, side scatter parameter; Treg, regulatory T cell.

## Supplementary Table 1 | REZPEG exposure in AD and PsO patients: Estimated $C_{\max}$ and $AUC_{\text{last}}$

**Supplementary Table 1 | REZPEG exposure in AD and PsO patients: Estimated  $C_{\max}$  and  $AUC_{\text{last}}$**

|     | <b>Dose<br/>(<math>\mu\text{g/kg}</math>)</b> | <b><math>C_{\max}</math><br/>(ng/mL)</b> | <b><math>AUC_{\text{last}}</math><br/>(ng*day/mL)</b> |
|-----|-----------------------------------------------|------------------------------------------|-------------------------------------------------------|
| AD  | 12                                            | 102.01                                   | 1144.93                                               |
|     | 24                                            | 218.68                                   | 2146.91                                               |
| PSO | 24                                            | 192.64                                   | 1841.04                                               |

AD, atopic dermatitis;  $AUC_{\text{last}}$ , area under the curve from dosing to the time of the last measured concentration;  $C_{\max}$ , geometric mean maximum concentration; PSO, psoriasis.

## Supplementary Table 2 | REZPEG efficacy in PsO patients at week 12

**Supplementary Table 2 | Week 12 PsO efficacy measures**

|                                                | n     | Placebo      | 24 µg/kg<br>REZPEG   |
|------------------------------------------------|-------|--------------|----------------------|
| Target lesion TSS % change from baseline (SEM) | 5, 11 | -1.1 (13.9)  | -51.0 (9.0)          |
| Treatment difference (95% CI)                  |       | ---          | -49.9 (-82.8, -16.9) |
| P value                                        |       |              | 0.004                |
| BSA % change from baseline (SEM)               | 5, 11 | -8.6 (19.3)  | -29.4 (12.3)         |
| Treatment difference (95% CI)                  |       | ---          | -20.7 (-66.5, 25.0)  |
| P value                                        |       |              | 0.369                |
| PASI % change from baseline (SEM)              | 5, 11 | -26.2 (12.9) | -44.5 (8.3)          |
| Treatment difference (95% CI)                  |       | ---          | -18.3 (-49.1, 12.4)  |
| P value                                        |       |              | 0.239                |
| Itch NRS % change from baseline (SEM)          | 5, 11 | -3.1 (19.4)  | -40.3 (12.7)         |
| Treatment difference (95% CI)                  |       | ---          | -37.2 (-83.4, 9.0)   |
| P value                                        |       |              | 0.113                |
| PGA % change from baseline (SEM)               | 5, 11 | 8.4 (15.3)   | -27.4 (10.2)         |
| Treatment difference (95% CI)                  |       | ---          | -35.8 (-72.3, 0.8)   |
| P value                                        |       |              | 0.055                |

A mixed model for repeated measures (MMRM) was used to generate Least-Squares Means for percent change from baseline in continuous efficacy variables with baseline score as the covariate, treatment arm and protocol-defined visit time and their interaction as the fixed factors. Visit time is also used as repeated measure to account for within-subject variability. Differences and their P values were derived for treatment vs placebo based on Least-Squares Means. 10 µg/kg REZPEG data were not presented due to small sample size. All analyses were based on the adjusted ITT population. BSA, body surface area; ITT, intent-to-treat; NRS, numerical rating scale; PASI, psoriasis area and severity index; PGA, Patient's Global Assessment of Disease Severity; SEM, standard error of the mean; TSS, Total Sign Score.

## Supplementary Table 3 | Efficacy durability in AD REZPEG 24 µg/kg cohort

**Supplementary Table 3 | Efficacy durability in REZPEG 24 µg/kg cohort**

|                       | Responders at<br>EOT | Responders<br>7 wk after EOT | Responders<br>36 wk after EOT | % Durability<br>between wk 12 and<br>wk 48 |
|-----------------------|----------------------|------------------------------|-------------------------------|--------------------------------------------|
|                       | Week 12              | Week 19                      | Week 48                       |                                            |
| EASI-50               | 12                   | 10                           | 7                             | 58.33                                      |
| EASI-75               | 7                    | 9                            | 5                             | 71.43                                      |
| EASI-90               | 4                    | 5                            | 4                             | 100.0                                      |
| vIGA <sup>a</sup>     | 5                    | 6                            | 4                             | 80.00                                      |
| Itch NRS <sup>b</sup> | 7                    | 7                            | 5                             | 71.43                                      |
| POEM <sup>c</sup>     | 11                   | 11                           | 7                             | 63.64                                      |
| DLQI <sup>d</sup>     | 12                   | 10                           | 5                             | 41.67                                      |

BSA; body surface area; DLQI, Dermatology Life Quality Index; EASI, Eczema Area and Severity Index; EASI-50, patients with a 50% decrease in EASI score from baseline; EASI-75, patients with a 75% decrease in EASI score from baseline; EASI-90, patients with a 90% decrease in EASI score from baseline; EOT, end-of-treatment at 12 weeks; NRS, numeric rating scale; POEM, Patient-Oriented Eczema Measure; vIGA-AD, Validated Investigator Global Assessment for Atopic Dermatitis. <sup>a</sup> Patients with post-baseline vIGA-AD scores of 0 or 1, with ≥ 2-point improvement from baseline. <sup>b</sup> Proportion with post-baseline itch scale reduced by ≥ 4 points among patients with baseline score ≥ 4. <sup>c</sup> Proportion with post-baseline POEM score reduced by ≥ 4 points among patients with baseline score ≥ 4. <sup>d</sup> Proportion with post-baseline DLQI score reduced by ≥ 4 points among patients with baseline score ≥ 4.

# Supplementary Table 4 | Table of statistically significant and list of non-significant serum proteomic biomarkers

| Assay        | OlincID  | UniProt        | P Value<br>24 µg/kg<br>vs. placebo | P Value<br>12 µg/kg<br>vs. placebo |
|--------------|----------|----------------|------------------------------------|------------------------------------|
| NCR1         | OID20566 | O76036         | < 1.00E-15                         | < 1.00E-15                         |
| CD160        | OID20647 | O95971         | < 1.00E-15                         | 1.02E-14                           |
| FASLG        | OID20665 | P48023         | < 1.00E-15                         | 8.18E-14                           |
| KLKB1        | OID20629 | Q12918         | < 1.00E-15                         | 9.66E-14                           |
| KLND1        | OID20632 | Q13241         | < 1.00E-15                         | 1.14E-12                           |
| XC11         | OID21398 | P47992         | < 1.00E-15                         | 6.42E-12                           |
| XC116        | OID20282 | Q9H2A7         | < 1.00E-15                         | 5.45E-10                           |
| CD163        | OID20360 | Q86VB7         | < 1.00E-15                         | 3.85E-09                           |
| IL2RA        | OID20267 | P01589         | < 1.00E-15                         | 9.11E-09                           |
| CD244        | OID20628 | Q98ZV8         | < 1.00E-15                         | 1.6E-08                            |
| IL15         | OID20562 | P40933         | < 1.00E-15                         | 2.42E-07                           |
| GZMA         | OID20663 | P12514         | < 1.00E-15                         | 0.003                              |
| ILIRB2       | OID20201 | Q9H423         | 5.33E-15                           | 6.80E-06                           |
| GNLY         | OID21132 | P22749         | 5.77E-15                           | 4.39E-06                           |
| SIGLEC7      | OID20190 | Q9Y286         | 9.66E-15                           | 2.39E-05                           |
| IL10         | OID20431 | P22301         | 2.24E-14                           | 2.99E-04                           |
| LY9          | OID20670 | Q9H6G7         | 3.46E-14                           | 6.88E-09                           |
| ADGRG1       | OID21294 | Q9Y653         | 5.55E-14                           | 1.90E-12                           |
| LTA          | OID20586 | P01374         | 5.92E-14                           | 5.69E-06                           |
| CD300C       | OID21010 | Q88708         | 1.97E-13                           | 2.60E-07                           |
| ICAM1        | OID20411 | P05362         | 3.00E-13                           | 6.73E-07                           |
| LAIR1        | OID20737 | Q66VX8         | 9.15E-13                           | 1.17E-05                           |
| SIGLEC1      | OID20690 | Q98Z22         | 8.54E-12                           | 7.27E-08                           |
| SLAMF8       | OID21214 | Q9P0V8         | 9.76E-12                           | 6.43E-05                           |
| IL2RB        | OID20450 | P14784         | 1.79E-11                           | 5.53E-04                           |
| CD123        | OID20693 | P55773         | 1.87E-11                           | 2.63E-06                           |
| MARCK        | OID20210 | Q9JEW3         | 1.97E-11                           | 2.18E-05                           |
| IL12RB1      | OID20486 | P42701         | 4.90E-11                           | 2.81E-08                           |
| ITGB2        | OID20315 | P05107         | 7.15E-11                           | 4.72E-04                           |
| KIR2DL3      | OID21196 | P34628         | 8.81E-11                           | 5.44E-07                           |
| CSF1         | OID20719 | P09603         | 1.03E-10                           | 7.33E-07                           |
| VSIG4        | OID21144 | Q9Y279         | 1.52E-10                           | 0.007                              |
| CR1AM        | OID20914 | O95727         | 1.93E-10                           | 5.69E-05                           |
| TNFRSF1B     | OID21145 | P13823         | 2.19E-10                           | 2.18E-05                           |
| DLL1         | OID21525 | O00548         | 3.48E-10                           | 3.76E-06                           |
| ADA2         | OID20394 | Q9NZK5         | 4.04E-10                           | 7.72E-04                           |
| LBP          | OID20355 | P18428         | 7.20E-10                           | 4.19E-07                           |
| MSR1         | OID21063 | P21757         | 1.59E-09                           | 0.038                              |
| CRHB2        | OID20747 | P24387         | 2.35E-09                           | 7.26E-04                           |
| CEACAM1      | OID20548 | Q8KFP0         | 2.98E-09                           | 1.47E-05                           |
| ENRPF        | OID20288 | Q13822         | 3.40E-09                           | 0.004                              |
| CD83         | OID20565 | Q01151         | 4.65E-09                           | 6.93E-04                           |
| B4GALT1      | OID20780 | P15291         | 4.91E-09                           | 4.76E-09                           |
| CD48         | OID20692 | P09326         | 6.89E-09                           | 1.66E-04                           |
| SIGLEC10     | OID20537 | Q96LC7         | 7.47E-09                           | 3.92E-04                           |
| IL1RB1       | OID20323 | Q8NHL6         | 7.80E-09                           | NA                                 |
| HAVCR2       | OID21137 | Q8TDD0         | 1.06E-08                           | 1.25E-04                           |
| CTSL         | OID20228 | P07711         | 1.21E-08                           | 5.86E-04                           |
| IL12A, IL12B | OID21327 | P29459, P29460 | 1.29E-08                           | 0.005                              |
| FCRL6        | OID20529 | Q6DN72         | 1.70E-08                           | 1.03E-06                           |
| VCAM1        | OID20396 | P19320         | 2.62E-08                           | 2.30E-05                           |
| SLAMF6       | OID21254 | Q96DU3         | 2.75E-08                           | 0.001                              |
| IL18R1       | OID20652 | Q13478         | 3.41E-08                           | 0.006                              |
| IL1RA2       | OID21152 | Q8N149         | 3.99E-08                           | 6.05E-04                           |
| IL12B        | OID20666 | P12982         | 7.56E-08                           | 0.034                              |
| SH2D1A       | OID20514 | O60880         | 1.54E-07                           | NA                                 |
| IGFBP7       | OID20236 | P16270         | 1.56E-07                           | NA                                 |
| ANGPT2       | OID21463 | O15123         | 2.87E-07                           | 0.001                              |
| TIMD4        | OID20375 | Q96H15         | 3.06E-07                           | NA                                 |
| NRP1         | OID20390 | I47486         | 3.21E-07                           | 3.72E-07                           |
| CD300LF      | OID21469 | Q8TDD1         | 6.91E-07                           | NA                                 |
| SIERP1       | OID20739 | Q02841         | 8.24E-07                           | 0.016                              |
| CCL14        | OID20401 | Q16627         | 8.61E-07                           | 1.34E-04                           |
| CD27         | OID21527 | P26842         | 9.16E-07                           | 0.003                              |
| CCL24        | OID20772 | Q00175         | 9.66E-07                           | NA                                 |
| IL1RL1       | OID20250 | Q01638         | 1.07E-06                           | NA                                 |
| AXL          | OID20363 | P30530         | 1.36E-06                           | 0.003                              |
| COL18A1      | OID20332 | P39060         | 1.52E-06                           | 3.18E-04                           |
| PKP2         | OID20337 | P42785         | 1.77E-06                           | 0.015                              |
| CCL18        | OID20395 | P55774         | 1.90E-06                           | 0.024                              |
| CA6          | OID21096 | P23280         | 1.96E-06                           | 0.016                              |
| FCN2         | OID20382 | Q15485         | 2.25E-06                           | 0.002                              |
| C1QA         | OID20654 | P02745         | 2.38E-06                           | NA                                 |
| NID1         | OID20362 | P14543         | 2.95E-06                           | 1.51E-04                           |
| TNC          | OID20359 | P24821         | 2.97E-06                           | NA                                 |
| DSG2         | OID21078 | Q02487         | 3.02E-06                           | 0.016                              |
| ICAM3        | OID20277 | P32942         | 3.30E-06                           | NA                                 |
| BST2         | OID21029 | Q10589         | 4.89E-06                           | 0.002                              |
| IL18         | OID20694 | Q14116         | 4.97E-06                           | 0.013                              |
| ITM2A        | OID20504 | O43736         | 5.33E-06                           | 0.011                              |
| COL4A1       | OID20208 | Q02462         | 6.80E-06                           | 0.035                              |
| CPVL         | OID21435 | Q9H3G5         | 6.83E-06                           | 1.12E-04                           |

| Assay           | OlincID  | UniProt | P Value<br>24 µg/kg<br>vs. placebo | P Value<br>12 µg/kg<br>vs. placebo |
|-----------------|----------|---------|------------------------------------|------------------------------------|
| NOS1            | OID20863 | P29475  | 6.93E-06                           | 0.001                              |
| TMPPRSS5        | OID20947 | Q9H353  | 7.72E-06                           | NA                                 |
| ANGPT13         | OID20407 | O9Y5C1  | 8.54E-06                           | NA                                 |
| GZMB            | OID20604 | P10144  | 8.61E-06                           | NA                                 |
| ADGRG2          | OID20755 | Q9UHK3  | 9.04E-06                           | 1.07E-04                           |
| OSCAR           | OID20775 | O8YV55  | 1.03E-05                           | 0.018                              |
| TACSTD2         | OID21447 | P09758  | 1.05E-05                           | 0.001                              |
| CLC             | OID20126 | Q05315  | 1.42E-05                           | 0.005                              |
| ALDH3A1         | OID20512 | P30838  | 1.55E-05                           | 0.016                              |
| FCGR3B          | OID20387 | O75015  | 1.56E-05                           | 0.028                              |
| THBS4           | OID20368 | P35443  | 1.67E-05                           | 1.24E-07                           |
| KCNMB           | OID20813 | Q6P166  | 1.84E-05                           | 0.003                              |
| CMBP            | OID21481 | P20851  | 1.99E-05                           | 0.004                              |
| CD79B           | OID20635 | P40259  | 2.26E-05                           | 0.003                              |
| LGALS7, LGALS7B | OID21406 | P47929  | 2.48E-05                           | 0.007                              |
| SEMA7A          | OID20283 | O75326  | 3.07E-05                           | 7.86E-05                           |
| ADGRG5          | OID20260 | P48960  | 3.42E-05                           | 0.001                              |
| PBLD            | OID20839 | P30309  | 4.51E-05                           | NA                                 |
| ITGA5           | OID20945 | P08448  | 4.52E-05                           | NA                                 |
| ENRPF           | OID20689 | Q6UWV6  | 4.58E-05                           | 4.40E-06                           |
| CD300E          | OID21418 | Q496F6  | 4.97E-05                           | 9.93E-05                           |
| GFR1A           | OID21457 | P56159  | 5.19E-05                           | NA                                 |
| PILRA           | OID21129 | Q9UK13  | 5.71E-05                           | 0.002                              |
| CD74            | OID21040 | P04233  | 6.06E-05                           | 0.004                              |
| IL20            | OID20453 | Q9NYVY  | 8.42E-05                           | NA                                 |
| LGALS9          | OID20781 | Q00182  | 8.82E-05                           | 0.003                              |
| ADAM15          | OID20109 | Q13444  | 9.45E-05                           | 4.82E-06                           |
| WAR5            | OID21084 | P23381  | 9.54E-05                           | 0.005                              |
| CLEC7A          | OID20636 | Q98N34  | 9.63E-05                           | NA                                 |
| CDH5            | OID20243 | P33151  | 9.77E-05                           | 6.87E-05                           |
| HSP62           | OID20383 | P98160  | 9.78E-05                           | 5.25E-05                           |
| NOTCH1          | OID20311 | P46531  | 9.86E-05                           | 0.023                              |
| DRAKIN          | OID20917 | Q9H813  | 1.03E-04                           | 0.024                              |
| HLA-DRA         | OID20530 | P01903  | 1.06E-04                           | NA                                 |
| IL4             | OID20809 | Q6ZM04  | 1.16E-04                           | 0.001                              |
| TIMP1           | OID20418 | P10133  | 1.20E-04                           | 4.25E-04                           |
| ASA4H           | OID20996 | Q9NR71  | 1.51E-04                           | NA                                 |
| WFIKN1          | OID20939 | Q96N28  | 1.53E-04                           | 0.003                              |
| IL18R4          | OID20429 | Q8NH06  | 1.62E-04                           | 0.004                              |
| IL18R5          | OID20324 | O75023  | 1.73E-04                           | NA                                 |
| KEL             | OID20981 | P23276  | 1.76E-04                           | NA                                 |
| CS23            | OID20400 | P01034  | 1.80E-04                           | 2.83E-04                           |
| IL10R8          | OID20696 | Q98334  | 2.12E-04                           | 8.06E-05                           |
| RNASE3          | OID20203 | P12724  | 2.15E-04                           | NA                                 |
| DSG3            | OID21460 | P23926  | 2.17E-04                           | 0.001                              |
| LPO             | OID20963 | P22079  | 2.19E-04                           | 0.046                              |
| AGR2            | OID20896 | O95994  | 2.23E-04                           | 1.55E-05                           |
| SDC1            | OID20169 | P18827  | 2.24E-04                           | 0.028                              |
| TNFRSF1A        | OID21155 | P19438  | 2.28E-04                           | 0.003                              |
| VCAN            | OID21026 | P13611  | 2.44E-04                           | 0.023                              |
| ADAM8           | OID21039 | P78325  | 2.63E-04                           | NA                                 |
| TNFSF13B        | OID20722 | O9Y275  | 2.70E-04                           | 0.001                              |
| TNFSF13         | OID20733 | O75888  | 3.07E-04                           | 0.005                              |
| IL33            | OID20428 | O75023  | 3.30E-04                           | 0.012                              |
| SEPR            | OID20184 | P23407  | 3.40E-04                           | NA                                 |
| TGDF1           | OID20816 | P13385  | 4.29E-04                           | 4.20E-05                           |
| SEMA4D          | OID21020 | Q92854  | 4.36E-04                           | 0.034                              |
| ACP5            | OID20314 | P13686  | 4.45E-04                           | NA                                 |
| IL18BP          | OID20348 | O95998  | 4.46E-04                           | 0.010                              |
| MZB1            | OID20732 | Q8WU39  | 4.58E-04                           | 0.011                              |
| KITLG           | OID20196 | P21583  | 4.65E-04                           | NA                                 |
| ATF2            | OID21491 | P35916  | 4.78E-04                           | NA                                 |
| THBD            | OID20231 | P07204  | 5.04E-04                           | NA                                 |
| RRM2            | OID21187 | P13350  | 5.30E-04                           | NA                                 |
| LAIR2           | OID20965 | Q61554  | 5.63E-04                           | 0.006                              |
| LSM1            | OID21210 | O15116  | 6.38E-04                           | 7.26E-07                           |
| IL6R            | OID20385 | P08887  | 6.48E-04                           | 0.003                              |
| FLT4            | OID20451 | P35916  | 6.81E-04                           | 0.003                              |
| SCARF2          | OID20941 | C14108  | 7.07E-04                           | 3.14E-04                           |
| C19orf12        | OID20804 | Q9NSK7  | 7.17E-04                           | NA                                 |
| SLAMF7          | OID20602 | Q9N025  | 7.30E-04                           | 0.001                              |
| CD59            | OID20339 | P13987  | 7.88E-04                           | NA                                 |
| CD200R1         | OID20595 | O8TD46  | 8.02E-04                           | 0.030                              |
| CDCP1           | OID20940 | Q9H5V8  | 8.59E-04                           | 0.010                              |
| IL17RB          | OID20585 | Q9NMK6  | 8.84E-04                           | 0.013                              |
| LAP3            | OID20436 | P28838  | 9.10E-04                           | 0.012                              |
| EPO             | OID20522 | P01588  | 9.77E-04                           | NA                                 |
| VWF             | OID20256 | P04275  | 0.001                              | NA                                 |
| KRT5            | OID20860 | P13647  | 0.001                              | 0.049                              |
| SIGLEC6         | OID21394 | O43699  | 0.001                              | 4.61E-04                           |
| TNFRSF8         | OID21049 | P28908  | 0.001                              | NA                                 |
| DCR1            | OID21480 | O724W1  | 0.001                              | NA                                 |

| Assay    | OlincID  | UniProt | P Value<br>24 µg/kg<br>vs. placebo | P Value<br>12 µg/kg<br>vs. placebo |
|----------|----------|---------|------------------------------------|------------------------------------|
| CLC22    | OID20765 | O00626  | 0.001                              | 0.003                              |
| KLKB     | OID21517 | O60259  | 0.001                              | NA                                 |
| CLEC4A   | OID20573 | Q9UMR7  | 0.001                              | 0.020                              |
| SIGLEC9  | OID21390 | Q9Y336  | 0.001                              | NA                                 |
| ACOL9    | OID20675 | O07325  | 0.001                              | NA                                 |
| CTSV     | OID21405 | O60911  | 0.001                              | NA                                 |
| COL6A3   | OID20292 | P12111  | 0.001                              | 0.028                              |
| GRPEL1   | OID21309 | Q9H4V7  | 0.001                              | 0.009                              |
| CD6      | OID20649 | P30203  | 0.001                              | NA                                 |
| TPPP3    | OID20842 | Q9BW30  | 0.001                              | NA                                 |
| THY1     | OID21050 | P04216  | 0.002                              | 0.003                              |
| BRK1     | OID20883 | Q8UWV1  | 0.002                              | 0.046                              |
| FSTL1    | OID20782 | O95623  | 0.002                              | 0.006                              |
| CST5     | OID20995 | P28325  | 0.002                              | NA                                 |
| CL26     | OID20546 | Q9Y258  | 0.002                              | NA                                 |
| C2       | OID20397 | Q9NPP3  | 0.002                              | 0.002                              |
| C9       | OID20410 | P06681  | 0.002                              | 4.17E-04                           |
| FCRL3    | OID20443 | Q96P31  | 0.002                              | 0.003                              |
| AGF7     | OID20374 | P21563  | 0.002                              | NA                                 |
| BTNA1    | OID20713 | O74V77  | 0.002                              | 0.001                              |
| ITGA11   | OID20581 | Q9UHK5  | 0.002                              | NA                                 |
| PLA2G7   | OID21105 | Q13093  | 0.002                              | NA                                 |
| XCCL1    | OID20976 | P78423  | 0.002                              | NA                                 |
| TINAGL1  | OID20180 | Q9GZM7  | 0.002                              | NA                                 |
| PLA2G2A  | OID20274 | P14555  | 0.002                              | NA                                 |
| ADOF15   | OID20883 | O95988  | 0.002                              | 3.08E-04                           |
| NTPE8NP  | OID20125 | NTPE8NP | 0.002                              | 0.036                              |
| ICAM2    | OID20248 | P13598  | 0.002                              | NA                                 |
| MET      | OID20269 | P08581  | 0.002                              | 0.030                              |
| CASA     | OID20075 | P35218  | 0.002                              | NA                                 |
| RARE52   | OID20373 | Q99969  | 0.002                              | 0.002                              |
| MMP3     | OID21083 | P08254  | 0.002                              | NA                                 |
| NO53     | OID20834 | P29474  | 0.002                              | NA                                 |
| RBP5     | OID21369 | P78980  | 0.002                              | 0.010                              |
| NID2     | OID21085 | Q14112  | 0.003                              | 0.022                              |
| CD4      | OID20584 | P01730  | 0.003                              | 0.030                              |
| FGF21    | OID21402 | Q9NSA1  | 0.003                              | NA                                 |
| CRIM1    | OID20701 | Q9NZV1  | 0.003                              | 0.010                              |
| TNFR2    | OID21471 | O43464  | 0.003                              | 0.006                              |
| HTFA8    | OID20981 | O14763  | 0.003                              | 6.82E-05                           |
| CD38     | OID21316 | P28907  | 0.003                              | NA                                 |
| IFNG     | OID20495 | P01579  | 0.003                              | 4.49E-04                           |
| HAO1     | OID21395 | Q9UJH8  | 0.003                              | NA                                 |
| DAO      | OID20645 | P00813  | 0.004                              | NA                                 |
| PCDC1    | OID21396 | Q15116  | 0.004                              | NA                                 |
| IL1R1    | OID21116 | P14778  | 0.004                              | NA                                 |
| TNFRSF21 | OID21052 | O75509  | 0.004                              | NA                                 |
| LTBR     | OID20768 | P36941  | 0.004                              | 1.38E-04                           |
| PCDD1L2  | OID21273 | Q98Q51  | 0.005                              | 0.003                              |
|          |          |         |                                    |                                    |

L8, CCN2, CCN3, CCN4, CCN5, CCS, CCT5, CD164, CD177, CD1C, CD200, CD207, CD209, CD22, CD274, CD28, CD2AP, CD300LG, CD33, CD34, CD40, CD40LG, CD46, CD5, CD58, CD63, CD69, CD70, CD84, CD8A, CD99L2, CDC27, CDC37, CDH1, CDH15, CDH17, CDH2, CDH3, CDH6, CDHR1, CDHR2, CDHR5, CDKN1A, CDKN2D, CDNF, CDON, CDSN, CEACAM3, CEACAM5, CEACAM8, CEBPB, CELA3A, CEP164, CEP20, CEP43, CEP85, CERT, CES1, CES2, CES3, CETN2, CFC1, CGA, CGREF1, CHAC2, CHEK2, CHGB, CHI3L1, CHIT1, CHL1, CHMP1A, CHRDL1, CIAPIN1, CKAP4, CKMT1A\_CKMT1B, CLEC10A, CLEC11A, CLEC14A, CLEC1A, CLEC1B, CLEC4C, CLEC4D, CLEC4G, CLEC5A, CLEC6A, CLIP2, CLMP, CLPP, CLPS, CLSPN, CLTA, CLUL1, CNDP1, CNPY2, CNPY4, CNST, CNTN1, CNTN2, CNTN3, CNTN4, CNTN5, COL1A1, COMP, COMT, COPE, CORO1A, COX5B, CPA1, CPA2, CPB1, CPE, CPM, CPED1, CPXM1, CR2, CRACR2A, CRADD, CREG1, CRELD2, CRH, CRHR1, CRIP2, CRISP2, CRKL, CRLF1, CRNN, CRTAC1, CRX, CSF2RA, CSF3, CST6, CST7, CSTB, CTF1, CTRB1, CTSC, CTSD, CTSE, CTSH, CTSS, CTSZ, CXCL1, CXCL10, CXCL12, CXCL13, CXCL17, CXCL3, CXCL5, CXCL6, CXCL8, DAB2, DAG1, DAPP1, DARS1, DBI, DBNL, DCBLD2, DCN, DCTN1, DCTN2, DCTN6, DCTPP1, DDAH1, DDC, DDR1, DDX58, DECR1, DEFA1\_DEFA1B, DEFB4A\_DEFB4B, DFFA, DGKZ, DIABLO, DKK1, DKK3, DKK4, DKKL1, DLK1, DNAJA2, DNAJB1, DNAJB8, DNER, DNMBP, DNPH1, DOK2, DPEP1, DPEP2, DPP10, DPP4, DPP6, DPP7, DPT, DPY30, DRG2, DSG2, DSG4, DTX3, DUOX2, DUSP3, EBAG9, ECE1, EDAR, EDIL3, EGF, EGFL7, EGFR, EGLN1, EIF4B, EIF4EBP1, EIF4G1, EIF5A, ELOA, ENAH, ENG, ENO1, ENO2, ENPP5, ENTPD2, ENTPD5, ENTPD6, EPCAM, EPHA1, EPHA10, EPHA2, EPHB6, EPHX2, EPS8L2, ERBB2, ERBB3, ERBIN, EREG, ERP44, ESAM, ESM1, EZR, F11R, F2R, F3, F7, FABP1, FABP2, FABP5, FABP6, FABP9, FADD, FAM3B, FAP, FAS, FBP1, FCAR, FCER2, FCGR2A, FCGR2B, FCRL1, FCRL2, FCRL5, FCRLB, FEN1, FES, FETUB, FGF19, FGF2, FGF23, FGF5, FGFR2, FGR, FHIT, FIS1, FKBP1B, FKBP4, FKBP5, FKBP7, FLI1, FLRT2, FLT1, FLT3, FLT3LG, FMNL1, FMR1, FOLR2, FOLR3, FOSB, FOXO1, FOXO3, FRZB, FUCA1, FURIN, FUS, FUT3\_FUT5, FUT8, FXN, FXYD5, FYB1, GAL, GALNT10, GALNT2, GALNT3, GALNT7, GBP2, GBP4, GCG, GDF2, GDNF, GFAP, GFER, GFOD2, GFRA2, GGA1, GGH, GGT1, GGT5, GH1, GH2, GHRHR, GHRL, GKN1, GLB1, GLO1, GLOD4, GLRX, GLT8D2, GMPR, GNE, GOPC, GP1BA, GP2, GP6, GPA33, GPC1, GPC5, GPKOW, GPNMB, GPR37, GRAP2, GRK5, GRN, GSAP, GSTA1, GSTA3, GSTP1, GUCA2A, GUSB, GYS1, HAGH, HARS1, HAVCR1, HBEGF, HBQ1, HCLS1, HDGF, HEBP1, HEXIM1, HGF, HGS, HK2, HLA\_E, HMBS, HMOX1, HMOX2, HNMT, HNRNPK, HPCAL1, HPGDS, HS6ST1, HSD11B1, HSP90B1, HSPA1A, HSPB1, HYAL1, ICA1, ICAM4, ICAM5, ICOSLG, IDI2, IDS, IDUA, IFNGR1, IFNL1, IFNLR1, IGF1R, IGFBP1, IGFBP2, IGFBP3, IGFBPL1, IGSF3, IGSF8, IKBKG, IKZF2, IL10RA, IL11, IL13, IL15RA, IL16, IL17A, IL17C, IL17D, IL17F, IL17RA, IL18RAP, IL1A, IL1B, IL1R2, IL1RAP, IL1RL2, IL1RN, IL20RA, IL22RA1, IL24, IL32, IL4, IL5, IL5RA, IL6, IL6ST, IL7, IL7R, ILKAP, IMPA1, ING1, INHBC, INPP1, INPPL1, IPCEF1, IQGAP2, IRAG2, IRAK1, IRAK4, ISLR2, ISM1, ITGA6, ITGAM, ITGAV, ITGB1BP1, ITGB1BP2, ITGB5, ITGB6, ITGB7, IVD, JAM2, JCHAIN, JUN, KAZALD1, KDR, KIFBP, KIR3DL1, KIRREL2, KIT, KLB, KLK1, KLK10, KLK11, KLK12, KLK13, KLK14, KLK4, KLK6, KRT14, KRT18, KRT19, KYAT1, KYNU, LACTB2, LAG3, LAMA4, LAMP2, LAT, LAT2, LAYN, LBR, LCN2, LDLR, LEFTY2, LEP, LEPR, LGALS1, LGALS3, LGALS4, LGALS8, LGMN, LHB, LHPP, LIF, LIFR, LILRA5, LPCAT2, LPL, LRIG1, LRP1, LRP11, LRPAP1, LRRC25, LRRN1, LSP1, LTA4H, LTBP2, LTBP3, LTO1, LXN, LY6D, LY75, LY96, LYAR, LYPD1, LYPD3, LYPD8, MAD1L1, MAEA, MAGED1, MANF, MAP2K6, MAP3K5, MAP4K5, MAPK9, MAPT, MASP1, MATN3, MAVS, MAX, MB, MCAM, MCFD2, MDGA1, MED18, MEGF10, MEGF9, MEP1B, MEPE, MERTK, MESD, METAP1, METAP1D, METAP2, MFAP3, MFAP5, MFGE8, MGLL, MGMT, MIA, MICB\_MICA, MIF, MILR1, MITD1, MLN, MME, MMP1, MMP10, MMP12, MMP13, MMP7, MMP8, MMP9, MNDA, MOG, MPHOSPH8, MPI, MPIG6B, MPO, MRPL46, MSLN, MSMB, MSRA, MSTN, MTPN, MUC13, MUC16, MVK, MYO9B, MYOC, MZT1, NAAA, NADK, NBL1, NBN, NCAM1, NCAM2, NCAN, NCF2, NCK2, NCLN, NCS1, NDRG1, NDUFS6, NECTIN4, NEFL, NELL1, NELL2, NFASC, NFATC1, NFKBIE, NGF, NINJ1, NME3, NMNAT1, NOTCH3, NPDC1, NPM1, NPPB, NPPC, NPTN, NPTX1, NPTXR, NPY, NRCAM, NRP2, NRTN, NSF1L1C, NT5C3A, NT5E, NTF3, NTF4, NTRK2, NTRK3, NUB1, NUCB2, NUDC, NUDT2, NUDT5, OBP2B, ODAM, OGFR, OGN, OLR1, OMD, OMG, OPTC, OSM, OSMR, P4HB, PADI2, PADI4, PAEP, PAG1, PAK4, PAM, PAMR1, PAPPA, PARK7, PARP1, PCDH1, PCOLCE, PCSK9, PDCD5, PDCD6, PDGFA, PDGFB, PDGFC, PDGFRA, PDGFRB, PDLIM7, PDP1, PEAR1, PEBP1, PE

CAM1, PFDN2, PFKFB2, PGLYRP1, PHOSPHO1, PI3, PIGR, PIK3AP1, PIK3IP1, PILRB, P  
KLR, PLA2G10, PLA2G15, PLA2G1B, PLA2G4A, PLAT, PLAUR, PLIN1, PLIN3, PLPBP, PL  
TP, PLXDC1, PLXNA4, PLXNB3, PM20D1, PMVK, PNLIPRP2, PNPT1, PODXL, PODXL2, POL  
R2F, PON2, PON3, PPCDC, PPIB, PPM1A, PPME1, PPP1R12A, PPP1R2, PPP1R9B, PQBP1,  
PRDX1, PRDX3, PRDX5, PRDX6, PREB, PRELP, PRKAB1, PRKAR1A, PRKRA, PRL, PROK1,  
PRSS2, PRSS27, PRTFDC1, PRTG, PRTN3, PSIP1, PSMA1, PSMD9, PSME1, PSME2, PSMG3  
, PSRC1, PTEN, PTGDS, PTH1R, PTK7, PTN, PTPN1, PTPN6, PTPRF, PTPRN2, PTPRS, P  
TX3, PVALB, PVR, PXN, QDPR, QPCT, RAB37, RAB6A, RAB6B, RABEPK, RABGAP1L, RAD2  
3B, RANGAP1, RARRES1, RASA1, RASSF2, RBKS, RBP2, RCOR1, REG1A, REG3A, REG4, R  
ELT, REN, RET, RETN, RGMA, RGMB, RGS8, RHOC, RILP, RNASET2, RNF41, ROBO1, ROR  
1, RP2, RRM2B, RSP01, RTBDN, RTN4R, RUVBL1, RWDD1, S100A11, S100A12, S100A16,  
S100A4, S100P, SAMD9L, SCAMP3, SCARA5, SCARB1, SCARF1, SCG2, SCG3, SCGB1A1, S  
CGB3A2, SCGN, SCLY, SCP2, SCRNI, SDC4, SELP, SELPLG, SEMA3F, SEMA4C, SEPTIN9,  
SERPINA11, SERPINA12, SERPINB1, SERPINB5, SERPINB6, SERPINB8, SERPINB9, SERPI  
NE1, SESTD1, SETMAR, SEZ6L, SEZ6L2, SF3B4, SFRP1, SFTPA1, SFTPA2, SFTPD, SH2B  
3, SHMT1, SIAE, SIGLEC15, SIGLEC5, SIRPA, SIRT2, SIRT5, SIT1, SKAP1, SKAP2, S  
LAMF1, SLC16A1, SLC27A4, SLC39A14, SLC39A5, SLIT2, SLITRK2, SLITRK6, SMAD5, S  
MARCA2, SMOC1, SMPD1, SMPDL3A, SNAP23, SNAP29, SNX9, SOD1, SOD2, SORCS2, SORD  
, SORT1, SOST, SPARC, SPINK1, SPINK4, SPINK5, SPINK6, SPINT1, SPINT2, SPOCK1,  
SPON1, SPP1, SPRY2, SRC, SRP14, SRPK2, SSB, SSC4D, ST3GAL1, ST6GAL1, STAMPB,  
STAT5B, STC1, STC2, STIP1, STK11, STK24, STK4, STX16, STX4, STX6, STX8, STXPB  
3, SUGT1, SULT1A1, SULT2A1, SUMF2, SUSD1, SUSD2, TACC3, TAF1A5, TANK, TARBP2,  
TBC1D17, TBC1D23, TBC1D5, TBCB, TBCC, TBL1X, TCL1A, TCL1B, TCN2, TDRKH, TFF1,  
TFF2, TFF3, TFPI, TFRC, TGFA, TGFB1, TGFB3, TGM2, THBS2, THOP1, THPO, TIA1,  
TIE1, TIGAR, TIMP3, TIMP4, TJAP1, TLR3, TMPRSS15, TMSB10, TNF, TNFAIP8, TNFRS  
F10A, TNFRSF10C, TNFRSF11A, TNFRSF12A, TNFRSF13B, TNFRSF13C, TNFRSF14, TNFRSF  
19, TNFRSF9, TNFRSF10, TNFRSF11, TNFRSF12, TNFRSF14, TNRI3, TNRI, TNXB, TP53, TP53  
INP1, TPMT, TPP1, TPSAB1, TPT1, TRAF2, TREM2, TREML2, TRIAP1, TRIM21, TRIM5,  
TSHB, TSPAN1, TST, TXLNA, TXNDC15, TXNDC5, TXNRD1, TYMP, TYRO3, UBAC1, ULBP2,  
UMOD, USP8, UXS1, VAMP5, VASH1, VAT1, VEGFA, VEGFC, VIM, VMO1, VNN2, VPS37A,  
VPS53, VSIR, VSTM1, VSTM2L, VTA1, VTCN1, VWC2, WAS, WASF1, WASF3, WFDC12, WFI  
KKN2, WIF1, WWP2, XG, XRCC4, YES1, YTHDF3, ZBTB17

**Supplementary Table 4 | Table of statistically significant and list of non-significant serum proteomic biomarkers.**

Differentially-detected serum proteins in AD patients over the 12-week REZPEG treatment induction period compared to placebo using Olink Explore panels. Data were fitted with a linear mixed model with multiple testing correction using Benjamini-Hochberg. Statistical comparisons were made between treatment and placebo using the Tukey method. Proteins with a statistically significant treatment-based change (threshold  $p < 0.05$ ) are shown in the table. Proteins that were not significantly different are listed below the table. Number of samples evaluated at each time point are provided in Supplementary Table 10. Source data are provided as a Source Data file.

## Supplementary Table 5 | Table of statistically significant REZPEG-modulated proteins grouped by pathway

|    | gs_exact_source | gs_description, pathway name                                                                                                | p value    | # found in pathway | total in pathway | genes/proteins_up                                                                                                                                                                                                                                                                                                                                                                                                                                                                                                                                                                                                                                                                                                                                                                                                                                                                                                              | genes/proteins_down                                             |
|----|-----------------|-----------------------------------------------------------------------------------------------------------------------------|------------|--------------------|------------------|--------------------------------------------------------------------------------------------------------------------------------------------------------------------------------------------------------------------------------------------------------------------------------------------------------------------------------------------------------------------------------------------------------------------------------------------------------------------------------------------------------------------------------------------------------------------------------------------------------------------------------------------------------------------------------------------------------------------------------------------------------------------------------------------------------------------------------------------------------------------------------------------------------------------------------|-----------------------------------------------------------------|
| 1  | R-HSA-198933    | Immunoregulatory interactions between a Lymphoid and a non-Lymphoid cell                                                    | 1.11E-16   | 37                 | 249              | SIGLEC9, LILRB2, ITGB1, CD300E, LILRA2, ICAM3, SLAMF6, SIGLEC1, ICAM1, CD200R1, NCR1, CD300LF, LILRB5, COLEC12, SH2D1A, OSCAR, NECTIN2, LILRB4, KLRD1, CXADR, SIGLEC10, LILRB1, VCAM1, SIGLEC7, CD160, LAIR2, PILRA, LAIR1, SIGLEC6, CD99, CRTAM, KLRB1, ICAM2, ITGB2, SLAMF7, CD300C, KIR2DL3                                                                                                                                                                                                                                                                                                                                                                                                                                                                                                                                                                                                                                 |                                                                 |
| 2  | R-HSA-168256    | Immune System                                                                                                               | 1.11E-16   | 136                | 2627             | LILRB2, SLAMF6, IL18BP, IL18, LYN, C2, CD300LF, HAVCR2, LTA, PRCP, LTBR, ZBTB16, PLAU, SH2D1A, LBP, IL12RB1, TIMP1, ADAM8, LILRB4, CST3, SIGLEC9, SIGLEC10, NOS3, IL4R, CSF1, RNASE3, FASLG, SDC1, B4GALT1, ICAM1, CD27, CD79B, LGALS9, BTN2A1, TNFRSF8, IL20, TNFRSF4, CD160, C1QA, C4BPB, IL3RA, IGF2R, ADA2, CD55, BRK1, PLA2G2A, CD4, CD200R1, VCAM1, ICAM3, CTSL, PILRA, CD93, BST2, TNFRSF1A, ITGB2, PDCD1, ATF2, CD300C, CASP10, NOS1, IFNGR2, IL17RB, LILRB5, CRTAM, MMP3, SIGLEC6, IL10, CD300E, ANPEP, IFNG, IL18R1, FCN2, FCGR3B, ADGRES, TNFRSF11B, EDA2R, IL2RB, NECTIN2, KLRD1, SIGLEC1, IL2RA, IL10RB, CLEC7A, IL6R, TNFSF13B, IL12B, OSCAR, TNFRSF1B, LAIR2, IL13, LILRA2, SIGLEC7, LAIR1, CD99, ICAM2, CCL4, KLRB1, KIR2DL3, GNLY, IL1R1, CD14, CEACAM1, TNFRSF6B, HLA_DRA, NCR1, NFATC3, CD74, PPP3R1, PDCD1LG2, BTN3A2, SIRPB1, SLAMF7, ITGB1, CD59, COLEC12, IL1RL1, IL13RA1, CXADR, TNFSF13, IL34, LILRB1 | LPO, CCL22, CTSV, IL15, CLEC4A, PRKCQ, IL19, TSLP, CCL11, CCL20 |
| 3  | R-HSA-449147    | Signaling by Interleukins                                                                                                   | 2.09E-12   | 47                 | 658              | TIMP1, IL4R, ICAM1, CSF1, IL18BP, IL18, LYN, HAVCR2, IL12RB1, SDC1, LBP, FASLG, IL20, LGALS9, TNFRSF1B, IL1R1, IL3RA, IFNG, CD4, IL33, CCL4, VCAM1, IL6R, IL12B, TNFRSF1A, ITGB2, ATF2, IL17RB, IL2RA, MMP3, IL10, ITGB1, IL18R1, IL1RL1, IL2RB, IL13RA1, IL10RB, IL34                                                                                                                                                                                                                                                                                                                                                                                                                                                                                                                                                                                                                                                         | CCL22, IL15, CCL11, TSLP, IL19, CCL20                           |
| 4  | R-HSA-1280215   | Cytokine Signaling in Immune system                                                                                         | 9.11E-12   | 60                 | 1039             | TIMP1, IL4R, ICAM1, CSF1, IL18BP, IL18, LYN, HAVCR2, LTA, LTBR, IL12RB1, SDC1, LBP, FASLG, CD27, TNFRSF4, TNFRSF8, IL20, LGALS9, TNFRSF1B, IL1R1, TNFRSF6B, IL3RA, IFNG, CD4, IL33, CCL4, VCAM1, IL6R, TNFSF13B, IL12B, BST2, TNFRSF1A, ITGB2, ATF2, HLA_DRA, IFNGR2, IL17RB, IL2RA, MMP3, IL10, ITGB1, IL18R1, TNFRSF11B, EDA2R, IL1RL1, IL2RB, IL13RA1, IL10RB, TNFSF13, IL34                                                                                                                                                                                                                                                                                                                                                                                                                                                                                                                                                | CCL22, IL15, CCL11, TSLP, IL19, CCL20                           |
| 5  | R-HSA-5669034   | TNFs bind their physiological receptors                                                                                     | 1.26E-10   | 11                 | 30               | TNFSF13, LTA, TNFSF13B, TNFRSF1B, TNFRSF6B, TNFRSF11B, EDA2R, TNFRSF1A, CD27, TNFRSF4, TNFRSF8                                                                                                                                                                                                                                                                                                                                                                                                                                                                                                                                                                                                                                                                                                                                                                                                                                 |                                                                 |
| 6  | R-HSA-1280218   | Adaptive Immune System                                                                                                      | 3.25E-10   | 53                 | 933              | SIGLEC9, LILRB2, LILRA2, SLAMF6, ICAM1, LYN, NCR1, CD300LF, ZBTB16, SH2D1A, OSCAR, LILRB4, SIGLEC10, CD79B, BTN2A1, SIGLEC7, CD160, LAIR2, LAIR1, CD99, NFATC3, CD74, PPP3R1, PDCD1LG2, CD4, KLRB1, ICAM2, CD200R1, VCAM1, ICAM3, CTSL, PILRA, ITGB2, PDCD1, BTN3A2, CD14, CD300C, HLA_DRA, NECTIN2, LILRB5, KIR2DL3, CRTAM, SIGLEC6, CD300E, SLAMF7, ITGB1, SIGLEC1, COLEC12, KLRD1, CXADR, LILRB1                                                                                                                                                                                                                                                                                                                                                                                                                                                                                                                            | CTSV, PRKCQ                                                     |
| 7  | R-HSA-216083    | Integrin cell surface interactions                                                                                          | 1.51E-09   | 15                 | 86               | ITGB1, ITGA5, VWF, ICAM3, ICAM1, COL6A3, COL4A1, HSPG2, ICAM2, VCAM1, COL18A1, ITGB2, TNC, COL9A1                                                                                                                                                                                                                                                                                                                                                                                                                                                                                                                                                                                                                                                                                                                                                                                                                              | ITGA11                                                          |
| 8  | R-HSA-1474244   | Extracellular matrix organization                                                                                           | 7.95E-09   | 27                 | 328              | TIMP1, ITGB1, VWF, ICAM3, ICAM1, NID2, MMP3, NID1, SDC1, VCAN, COL18A1, ADAM8, HSPG2, TNC, VCAM1, CTSL, ITGA5, ADAM15, CEACAM1, EFEMP1, COL6A3, COL4A1, ICAM2, ITGB2, COL9A1                                                                                                                                                                                                                                                                                                                                                                                                                                                                                                                                                                                                                                                                                                                                                   | ITGA11, CTSV                                                    |
| 9  | R-HSA-6783783   | Interleukin-10 signaling                                                                                                    | 9.65E-08   | 13                 | 86               | TIMP1, ICAM1, CSF1, IL10RB, IL18, IL12B, TNFRSF1B, IL1R1, TNFRSF1A, CCL4, IL10                                                                                                                                                                                                                                                                                                                                                                                                                                                                                                                                                                                                                                                                                                                                                                                                                                                 | CCL20, CCL22                                                    |
| 10 | R-HSA-381426    | Regulation of Insulin-like Growth Factor (IGF) transport and uptake by Insulin-like Growth Factor Binding Proteins (IGFBPs) | 2.34E-07   | 15                 | 127              | TIMP1, CST3, CCN1, SPARCL1, IGFBP6, CSF1, FSTL3, PROC, IGFBP4, GZMH, GAS6, IGFBP7, VCAN, TNC, VWA1                                                                                                                                                                                                                                                                                                                                                                                                                                                                                                                                                                                                                                                                                                                                                                                                                             |                                                                 |
| 11 | R-HSA-8957275   | Post-translational protein phosphorylation                                                                                  | 0.00000134 | 13                 | 109              | TIMP1, CST3, CCN1, SPARCL1, CSF1, FSTL3, PROC, IGFBP4, GAS6, IGFBP7, VCAN, TNC, VWA1                                                                                                                                                                                                                                                                                                                                                                                                                                                                                                                                                                                                                                                                                                                                                                                                                                           |                                                                 |
| 12 | R-HSA-202733    | Cell surface interactions at the vascular wall                                                                              | 0.00000168 | 20                 | 257              | ITGB1, ITGA5, THBD, CD48, CXADR, TNFRSF10B, PROC, LYN, CD99, CEACAM1, GAS6, CD244, PSGL1, CD74, TEK, SELE, SDC1, ITGB2, ANGPT2                                                                                                                                                                                                                                                                                                                                                                                                                                                                                                                                                                                                                                                                                                                                                                                                 | L1CAM                                                           |
| 13 | R-HSA-5668541   | TNFR2 non-canonical NF-κB pathway                                                                                           | 0.00000475 | 12                 | 104              | TNFSF13, LTA, TNFSF13B, TNFRSF1B, TNFRSF6B, TNFRSF11B, EDA2R, LTBR, TNFRSF1A, CD27, TNFRSF4, TNFRSF8                                                                                                                                                                                                                                                                                                                                                                                                                                                                                                                                                                                                                                                                                                                                                                                                                           |                                                                 |
| 14 | R-HSA-380108    | Chemokine receptors bind chemokines                                                                                         | 0.00000649 | 9                  | 57               | CXCL9, CCL4, XCL1, CXCL11                                                                                                                                                                                                                                                                                                                                                                                                                                                                                                                                                                                                                                                                                                                                                                                                                                                                                                      | CCL20, CCL11, CX3CL1, CCL22, CXCL16                             |
| 15 | R-HSA-6785807   | Interleukin-4 and Interleukin-13 signaling                                                                                  | 0.0000065  | 17                 | 211              | TIMP1, ITGB1, FASLG, IL6R, IL4R, ICAM1, IL13RA1, IL18, IL12B, TNFRSF1B, MMP3, LBP, VCAM1, ITGB2, IL10                                                                                                                                                                                                                                                                                                                                                                                                                                                                                                                                                                                                                                                                                                                                                                                                                          | CCL11, CCL22                                                    |

**Supplementary Table 5 | Table of statistically significant REZPEG-modulated proteins grouped by pathway.** Pathway analysis of dose-dependent and statistically significant differences in protein expression in response to REZPEG treatment compared to placebo using the Reactome knowledgebase. Source data are provided as a Source Data file.

## Supplementary Table 6 | Sample numbers for psoriasis pharmacokinetic and pharmacodynamic analyses

| Supplementary Table 6   Sample numbers for psoriasis pharmacokinetic and pharmacodynamic analyses |     |        |        |       |     |     |     |     |     |      |      |
|---------------------------------------------------------------------------------------------------|-----|--------|--------|-------|-----|-----|-----|-----|-----|------|------|
|                                                                                                   | Wk0 | Wk1-D5 | Wk1-D8 | Wk1.5 | Wk2 | Wk3 | Wk4 | Wk6 | Wk8 | Wk10 | Wk12 |
| Pharmacokinetics (ng/mL)                                                                          |     |        |        |       |     |     |     |     |     |      |      |
| 24 µg/kg, n                                                                                       | 20  | 21     | 15     | 20    | 18  | 18  | 15  | 13  | 11  | 10   | 11   |
| CD25 <sup>bright</sup> Tregs (cells/µl)                                                           |     |        |        |       |     |     |     |     |     |      |      |
| Placebo, n                                                                                        | 4   | 2      | 3      |       | 2   | 4   | 4   |     | 2   |      | 3    |
| 24 µg/kg, n                                                                                       | 20  | 19     | 16     |       | 14  | 15  | 12  |     | 9   |      | 7    |
| CD25 <sup>bright</sup> Tregs (fold change from baseline, cells/µl)                                |     |        |        |       |     |     |     |     |     |      |      |
| Placebo, n                                                                                        | 4   | 2      | 3      |       | 2   | 4   | 4   |     | 2   |      | 3    |
| 24 µg/kg, n                                                                                       | 19  | 18     | 15     |       | 13  | 14  | 11  |     | 8   |      | 7    |
| CD25 <sup>bright</sup> Tregs (%CD4+ T cells)                                                      |     |        |        |       |     |     |     |     |     |      |      |
| Placebo, n                                                                                        | 4   | 2      | 3      |       | 2   | 4   | 4   |     | 2   |      | 3    |
| 24 µg/kg, n                                                                                       | 20  | 19     | 16     |       | 14  | 14  | 11  |     | 9   |      | 7    |
| Total Tregs (cells/µl)                                                                            |     |        |        |       |     |     |     |     |     |      |      |
| Placebo, n                                                                                        | 4   | 2      | 3      |       | 2   | 4   | 4   |     | 2   |      | 3    |
| 24 µg/kg, n                                                                                       | 20  | 18     | 17     |       | 14  | 15  | 12  |     | 10  |      | 7    |
| Total Tregs (%CD4+ T cells)                                                                       |     |        |        |       |     |     |     |     |     |      |      |
| Placebo, n                                                                                        | 4   | 2      | 3      |       | 2   | 4   | 4   |     | 2   |      | 4    |
| 24 µg/kg, n                                                                                       | 20  | 19     | 16     |       | 14  | 13  | 11  |     | 9   |      | 7    |
| CD4+ T cells (cells/µl)                                                                           |     |        |        |       |     |     |     |     |     |      |      |
| Placebo, n                                                                                        | 4   | 2      | 3      |       | 2   | 4   | 4   |     | 2   |      | 3    |
| 24 µg/kg, n                                                                                       | 20  | 19     | 16     |       | 14  | 15  | 12  |     | 9   |      | 7    |
| CD4+ T cells (fold change from baseline, cells/µl)                                                |     |        |        |       |     |     |     |     |     |      |      |
| Placebo, n                                                                                        | 4   | 2      | 3      |       | 2   | 4   | 4   |     | 2   |      | 3    |
| 24 µg/kg, n                                                                                       | 20  | 18     | 16     |       | 14  | 15  | 12  |     | 9   |      | 7    |
| CD8+ T cells (cells/µl)                                                                           |     |        |        |       |     |     |     |     |     |      |      |
| Placebo, n                                                                                        | 4   | 2      | 3      |       | 2   | 4   | 4   |     | 2   |      | 3    |
| 24 µg/kg, n                                                                                       | 20  | 19     | 16     |       | 14  | 15  | 12  |     | 11  |      | 7    |
| CD8+ T cells (fold change from baseline, cells/µl)                                                |     |        |        |       |     |     |     |     |     |      |      |
| Placebo, n                                                                                        | 4   | 2      | 3      |       | 2   | 4   | 4   |     | 2   |      | 3    |
| 24 µg/kg, n                                                                                       | 20  | 18     | 16     |       | 14  | 15  | 12  |     | 11  |      | 7    |
| CD3-CD56+ NK (cells/µl)                                                                           |     |        |        |       |     |     |     |     |     |      |      |
| Placebo, n                                                                                        | 5   | 2      | 3      |       | 2   | 3   | 4   |     | 3   |      | 4    |
| 24 µg/kg, n                                                                                       | 21  | 18     | 15     |       | 15  | 16  | 14  |     | 13  |      | 10   |
| CD3-CD56 <sup>bright</sup> (%CD56+ NK cells)                                                      |     |        |        |       |     |     |     |     |     |      |      |
| Placebo, n                                                                                        | 4   | 2      | 3      |       | 2   | 4   | 4   |     | 2   |      | 4    |
| 24 µg/kg, n                                                                                       | 20  | 19     | 16     |       | 14  | 13  | 11  |     | 9   |      | 7    |
| CD3-CD56 <sup>dim</sup> (%CD56+ NK cells)                                                         |     |        |        |       |     |     |     |     |     |      |      |
| Placebo, n                                                                                        | 4   | 2      | 3      |       | 2   | 4   | 4   |     | 2   |      | 4    |
| 24 µg/kg, n                                                                                       | 20  | 19     | 16     |       | 14  | 13  | 11  |     | 9   |      | 7    |

## Supplementary Table 7 | Sample numbers for atopic dermatitis pharmacokinetic and pharmacodynamic analyses

| Supplementary Table 7   Sample numbers for atopic dermatitis pharmacokinetic and pharmacodynamic analyses |     |        |        |       |     |     |     |     |     |      |      |
|-----------------------------------------------------------------------------------------------------------|-----|--------|--------|-------|-----|-----|-----|-----|-----|------|------|
|                                                                                                           | Wk0 | Wk1-D5 | Wk1-D8 | Wk1.5 | Wk2 | Wk3 | Wk4 | Wk6 | Wk8 | Wk10 | Wk12 |
| Pharmacokinetics (ng/mL)                                                                                  |     |        |        |       |     |     |     |     |     |      |      |
| 12 µg/kg, n                                                                                               | 14  | 13     | 13     | 14    | 14  | 14  | 10  | 15  | 13  | 12   | 11   |
| 24 µg/kg, n                                                                                               | 15  | 14     | 14     | 17    | 16  | 16  | 13  | 16  | 14  | 12   | 12   |
| CD25 <sup>bright</sup> Tregs (cells/µl)                                                                   |     |        |        |       |     |     |     |     |     |      |      |
| Placebo, n                                                                                                | 8   | 8      | 9      |       | 8   | 5   | 7   |     | 5   |      | 4    |
| 12 µg/kg, n                                                                                               | 14  | 7      | 9      |       | 12  | 9   | 6   |     | 9   |      | 7    |
| 24 µg/kg, n                                                                                               | 16  | 11     | 8      |       | 14  | 10  | 10  |     | 12  |      | 11   |
| CD25 <sup>bright</sup> Tregs (fold change from baseline, cells/µl)                                        |     |        |        |       |     |     |     |     |     |      |      |
| Placebo, n                                                                                                | 8   | 7      | 7      |       | 7   | 5   | 6   |     | 5   |      | 3    |
| 12 µg/kg, n                                                                                               | 14  | 7      | 8      |       | 11  | 8   | 6   |     | 8   |      | 7    |
| 24 µg/kg, n                                                                                               | 15  | 10     | 8      |       | 13  | 9   | 10  |     | 11  |      | 9    |
| CD25 <sup>bright</sup> Tregs (%CD4+ T cells)                                                              |     |        |        |       |     |     |     |     |     |      |      |
| Placebo, n                                                                                                | 8   | 8      | 8      |       | 8   | 7   | 6   |     | 5   |      | 5    |
| 12 µg/kg, n                                                                                               | 14  | 7      | 9      |       | 12  | 9   | 6   |     | 8   |      | 7    |
| 24 µg/kg, n                                                                                               | 16  | 11     | 8      |       | 13  | 10  | 10  |     | 12  |      | 11   |
| Total Tregs (cells/µl)                                                                                    |     |        |        |       |     |     |     |     |     |      |      |
| Placebo, n                                                                                                | 8   | 8      | 9      |       | 8   | 6   | 7   |     | 5   |      | 4    |
| 12 µg/kg, n                                                                                               | 14  | 7      | 9      |       | 12  | 9   | 6   |     | 8   |      | 7    |
| 24 µg/kg, n                                                                                               | 16  | 11     | 8      |       | 14  | 10  | 10  |     | 12  |      | 11   |
| Total Tregs (%CD4+ T cells)                                                                               |     |        |        |       |     |     |     |     |     |      |      |
| Placebo, n                                                                                                | 8   | 8      | 8      |       | 8   | 6   | 7   |     | 5   |      | 5    |
| 12 µg/kg, n                                                                                               | 14  | 7      | 9      |       | 12  | 9   | 6   |     | 8   |      | 7    |
| 24 µg/kg, n                                                                                               | 16  | 11     | 8      |       | 13  | 10  | 10  |     | 12  |      | 11   |
| CD4+ T cells (cells/µl)                                                                                   |     |        |        |       |     |     |     |     |     |      |      |
| Placebo, n                                                                                                | 8   | 8      | 9      |       | 7   | 5   | 7   |     | 5   |      | 5    |
| 12 µg/kg, n                                                                                               | 14  | 7      | 9      |       | 12  | 9   | 6   |     | 8   |      | 7    |
| 24 µg/kg, n                                                                                               | 16  | 11     | 8      |       | 14  | 10  | 10  |     | 12  |      | 11   |
| CD4+ T cells (fold change from baseline, cells/µl)                                                        |     |        |        |       |     |     |     |     |     |      |      |
| Placebo, n                                                                                                | 8   | 7      | 7      |       | 6   | 5   | 6   |     | 5   |      | 4    |
| 12 µg/kg, n                                                                                               | 14  | 7      | 8      |       | 11  | 8   | 6   |     | 7   |      | 7    |
| 24 µg/kg, n                                                                                               | 15  | 11     | 8      |       | 12  | 10  | 10  |     | 11  |      | 10   |
| CD8+ T cells (cells/µl)                                                                                   |     |        |        |       |     |     |     |     |     |      |      |
| Placebo, n                                                                                                | 8   | 8      | 9      |       | 7   | 5   | 7   |     | 5   |      | 5    |
| 12 µg/kg, n                                                                                               | 14  | 7      | 9      |       | 12  | 9   | 6   |     | 8   |      | 7    |
| 24 µg/kg, n                                                                                               | 16  | 11     | 8      |       | 13  | 10  | 10  |     | 12  |      | 11   |
| CD8+ T cells (fold change from baseline, cells/µl)                                                        |     |        |        |       |     |     |     |     |     |      |      |
| Placebo, n                                                                                                | 8   | 7      | 7      |       | 6   | 5   | 6   |     | 5   |      | 4    |
| 12 µg/kg, n                                                                                               | 14  | 7      | 8      |       | 11  | 8   | 6   |     | 7   |      | 7    |
| 24 µg/kg, n                                                                                               | 15  | 11     | 8      |       | 11  | 10  | 10  |     | 11  |      | 10   |
| CD3-CD56+ NK (cells/µl)                                                                                   |     |        |        |       |     |     |     |     |     |      |      |
| Placebo, n                                                                                                | 10  | 8      | 10     |       | 7   | 7   | 8   |     | 9   |      | 6    |
| 12 µg/kg, n                                                                                               | 15  | 7      | 10     |       | 12  | 11  | 10  |     | 11  |      | 9    |
| 24 µg/kg, n                                                                                               | 16  | 12     | 11     |       | 14  | 12  | 13  |     | 12  |      | 12   |
| CD3-CD56 <sup>bright</sup> (%CD56+ NK cells)                                                              |     |        |        |       |     |     |     |     |     |      |      |
| Placebo, n                                                                                                | 8   | 8      | 8      |       | 7   | 5   | 7   |     | 5   |      | 5    |
| 12 µg/kg, n                                                                                               | 14  | 7      | 9      |       | 12  | 9   | 6   |     | 8   |      | 7    |
| 24 µg/kg, n                                                                                               | 16  | 11     | 8      |       | 13  | 10  | 10  |     | 12  |      | 11   |
| CD3-CD56 <sup>dim</sup> (%CD56+ NK cells)                                                                 |     |        |        |       |     |     |     |     |     |      |      |
| Placebo, n                                                                                                | 8   | 8      | 8      |       | 8   | 5   | 7   |     | 5   |      | 5    |
| 12 µg/kg, n                                                                                               | 14  | 7      | 9      |       | 12  | 9   | 6   |     | 8   |      | 7    |
| 24 µg/kg, n                                                                                               | 16  | 11     | 8      |       | 13  | 10  | 10  |     | 12  |      | 11   |

## Supplementary Table 8 | Psoriasis patient numbers for continuous endpoints

| Supplementary Table 8   PsO patient numbers at continuous endpoints |     |     |     |     |     |     |      |      |      |      |      |
|---------------------------------------------------------------------|-----|-----|-----|-----|-----|-----|------|------|------|------|------|
|                                                                     | Wk0 | Wk2 | Wk3 | Wk4 | Wk6 | Wk8 | Wk10 | Wk12 | Wk14 | Wk16 | Wk19 |
| Placebo, n                                                          | 5   | 5   | 5   | 5   | 5   | 5   | 4    | 5    | 4    | 5    | 5    |
| 24 µg/kg, n                                                         | 21  | 18  | 17  | 14  | 13  | 12  | 11   | 11   | 11   | 11   | 11   |

## Supplementary Table 9 | Atopic dermatitis patient numbers for continuous endpoints

**Supplementary Table 9 | AD patient numbers at continuous endpoints**

|             | Wk0 | Wk2 | Wk3 | Wk4 | Wk6 | Wk8 | Wk10 | Wk12 | Wk14 | Wk16 | Wk19 | Wk24 | Wk28 | Wk32 | Wk36 | Wk40 | Wk44 | Wk48 |
|-------------|-----|-----|-----|-----|-----|-----|------|------|------|------|------|------|------|------|------|------|------|------|
| Placebo, n  | 10  | 8   | 6   | 8   | 6   | 8   | 5    | 7    | 5    | 5    | 6    | 1    | 2    | 1    | 1    | 1    | 1    | 1    |
| 12 µg/kg, n | 16  | 16  | 15  | 15  | 14  | 14  | 12   | 12   | 12   | 12   | 12   | 7    | 5    | 5    | 5    | 4    | 3    | 4    |
| 24 µg/kg, n | 17  | 16  | 16  | 15  | 15  | 14  | 13   | 12   | 13   | 13   | 13   | 8    | 9    | 9    | 7    | 7    | 7    | 7    |

## Supplementary Table 10 | Sample numbers for serum proteomic biomarker analyses

| <b>Supplementary Table 10   Sample numbers for serum protein biomarker analyses</b> |     |     |     |     |      |
|-------------------------------------------------------------------------------------|-----|-----|-----|-----|------|
|                                                                                     | Wk0 | Wk2 | Wk3 | Wk4 | Wk12 |
| Placebo, n                                                                          | 8   | 8   | 8   | 8   | 8    |
| 12 µg/kg, n                                                                         | 16  | 16  | 16  | 15  | 12   |
| 24 µg/kg, n                                                                         | 16  | 16  | 16  | 14  | 12   |

## Supplementary Table 11 | Rescue medications for the indication of atopic dermatitis

**Supplementary Table 11 | Rescue medications for the indication of atopic dermatitis**

| Number of patients, n (%)                       | Pooled<br>Placebo N=10 | 10 µg/kg<br>REZPEG N=1 | 12 µg/kg<br>REZPEG N=16 | 24 µg/kg<br>REZPEG N=17 | Overall<br>REZPEG N=34 |
|-------------------------------------------------|------------------------|------------------------|-------------------------|-------------------------|------------------------|
| Use of any rescue medication - on treatment     | 1 (10)                 | 0                      | 0                       | 0                       | 0                      |
| Triamcinolone/Triamcinolone acetonide 0.1%      | 1 (10)                 | 0                      | 0                       | 0                       | 0                      |
| Use of any rescue medication - during follow-up | 0                      | 0                      | 2 (12.5)                | 1 (5.9)                 | 3 (8.8)                |
| Triamcinolone/Triamcinolone acetonide 0.1%      | 0                      | 0                      | 1 (6.3)                 | 1 (5.9)                 | 2 (5.9)                |
| Prednisone                                      | 0                      | 0                      | 1 (6.3)                 | 0                       | 1 (2.9)                |

## Supplementary Table 12 | Source antibodies used for pharmacokinetic and pharmacodynamic assessments

**Supplementary Table 12 | Source antibodies used for pharmacokinetic and pharmacodynamic assessments**

| Antibody                         | Supplier       | Cat. No.    | Stock Conc. | Final Conc.             |
|----------------------------------|----------------|-------------|-------------|-------------------------|
| Mouse anti-human IL-2            | Eli Lilly      | Custom      | 7.18 mg/mL  | 1 µg/mL                 |
| Mouse anti-human IL-2            | MabTech        | 3445-5-1000 | 0.5 mg/mL   | 1 µg/mL                 |
| Rabbit biotin anti-PEG           | Abcam          | ab53449     | 0.01 mg/mL  | 0.05 µg/mL              |
| BB515 mouse anti-human CD25      | BD Biosciences | 564467      | 100 tests   | 5 µL/test               |
| PE mouse anti-human CD8          | BD Biosciences | 555367      | 100 tests   | 20 µL/test              |
| PerCP-Cy5.5 mouse anti-human CD3 | BD Biosciences | 340949      | 3.0 µg/mL   | 0.06 µg/mL (20 µL/test) |
| PE-Cy7 mouse anti-human CD56     | BD Biosciences | 335791      | 25 µg/mL    | 0.125 µg/mL (5 µL/test) |
| AF647 mouse anti-human FoxP3     | BD Biosciences | 560045      | 100 tests   | 20 µL/test              |
| APC-H7 mouse anti-human CD45     | BD Biosciences | 560178      | 100 tests   | 5 µL/test               |
| BV421 mouse anti-human Ki67      | BD Biosciences | 562899      | 50 tests    | 5 µL/test               |
| BV510 mouse anti-human CD4       | BD Biosciences | 562970      | 100 tests   | 5 µL/test               |

## Supplementary References

1. Fanton, C., et al. Selective expansion of regulatory T cells by NKTR-358 in healthy volunteers and patients with systemic lupus erythematosus. *J. Transl. Autoimmun.* **5**, 100152 (2022).
